# Supplementary material for: Mononuclear nickel(ii)–flavonolate complexes of tetradentate tripodal 4N ligands as structural and functional models for quercetin 2,4-dioxygenase: structures, spectra, redox and dioxygenase activity
Source: Royal Society of Chemistry journal article supplement (doi:10.1039/d3ra04834a), 2023-01-01
Supplement: d3ra04834a1.pdf [file d3ra04834a1.pdf]

## Supplementary Information

### **Mononuclear Nickel(II)-Flavonolate Complexes of Tetradentate Tripodal 4N Ligands as Structural and Functional Models for Quercetin 2,4-dioxygenase: Structures, Spectra, Redox and Dioxygenase Activity**

Tamilarasan Ajaykamal,<sup>a</sup> and Mallayan Palaniandavar<sup>a\*</sup>

<sup>a</sup>*Department of Chemistry, Bharathidasan University, Tiruchirapalli 620 024, Tamil Nadu, India*

| S. No            | Title                                                                                                                                                                                                                                                                                                                                                            | Page No. |
|------------------|------------------------------------------------------------------------------------------------------------------------------------------------------------------------------------------------------------------------------------------------------------------------------------------------------------------------------------------------------------------|----------|
| <b>Table S1</b>  | Structure refinement details for <b>1</b> and <b>3</b> .                                                                                                                                                                                                                                                                                                         | 8        |
| <b>Table S2</b>  | Selected bond angles [°] for <b>1</b> and <b>3</b> .                                                                                                                                                                                                                                                                                                             | 9        |
| <b>Figure S1</b> | Cyclic voltammograms and DPV of flavonone ligand ( $1.0 \times 10^{-3}$ M) and complex <b>2</b> in DMF at 25 °C. Conditions: supporting electrolyte, 0.1 M TBAP; Scan rate, CV, 50 mVs <sup>-1</sup> and DPV, 2 mVs <sup>-1</sup> for all complexes, reference electrode, calomel electrode; working electrode, Glassy carbon; Counter electrode, platinum wire. | 10       |
| <b>Figure S2</b> | IR spectra of complexes <b>1</b> and <b>3</b> .                                                                                                                                                                                                                                                                                                                  | 11       |
| <b>Table S3</b>  | Computed structural parameters and energy gap values of the geometric isomers <b>1b–3b</b>                                                                                                                                                                                                                                                                       | 12       |
| <b>Figure S3</b> | Computed frontier molecular orbitals (LUMO) of complexes [Ni(L1)(fla)]ClO <sub>4</sub> <b>1</b> , [Ni(L2)(fla)]ClO <sub>4</sub> <b>2</b> and [Ni(L3)(fla)]ClO <sub>4</sub> <b>3</b> .                                                                                                                                                                            | 13       |
| <b>Figure S4</b> | Computed frontier molecular orbitals (HOMO) of complexes [Ni(L1)(fla)]ClO <sub>4</sub> <b>1</b> , [Ni(L2)(fla)]ClO <sub>4</sub> <b>2</b> and [Ni(L3)(fla)]ClO <sub>4</sub> <b>3</b> .                                                                                                                                                                            | 14       |
| <b>Table S4</b>  | Computed HOMO energies for the complexes <b>1–3</b> .                                                                                                                                                                                                                                                                                                            | 15       |
| <b>Table S5</b>  | Torsion angles [°] <b>1–3</b> .                                                                                                                                                                                                                                                                                                                                  | 16       |
| <b>Table S6</b>  | Computed bond angles [°] of complexes <b>1–3</b> .                                                                                                                                                                                                                                                                                                               | 16       |
| <b>Table S7</b>  | Computed bond angles [°] of geometric isomers <b>1b–3b</b> .                                                                                                                                                                                                                                                                                                     | 17       |
| <b>Figure S5</b> | Spectral changes of <b>3</b> ( $1.4 \times 10^{-4}$ M) in the presence of NBT <sup>2+</sup> ( $3.0 \times 10^{-4}$ M) (red) in DMF at 70 °C under O <sub>2</sub> (pink) and N <sub>2</sub> (green).                                                                                                                                                              | 18       |
| <b>Scheme S1</b> | Changes in bond length upon removal of an electron from Ni(II)-bound flavonolate in <b>2–3</b> to form the radical <b>2A–3A</b> .                                                                                                                                                                                                                                | 19       |
| <b>Figure S6</b> | HOMO and LUMO energy profile diagram for the complexes <b>2</b> and <b>2A</b> .                                                                                                                                                                                                                                                                                  | 20       |
| <b>Figure S7</b> | HOMO and LUMO energy profile diagram for the complexes <b>3</b> and <b>3A</b> .                                                                                                                                                                                                                                                                                  | 21       |
| <b>Table S8</b>  | Important bond lengths (Å) of coordinated flavonolate for the complexes [Ni(L)(fla)] <sup>+</sup> <b>1–3</b> and the radical intermediates [Ni(L)(fla')] <sup>2+</sup> <b>1A–3A</b> .                                                                                                                                                                            | 22       |

|                   |                                                                                                                                                                                                                                                                                                                                                                                                                                                 |     |
|-------------------|-------------------------------------------------------------------------------------------------------------------------------------------------------------------------------------------------------------------------------------------------------------------------------------------------------------------------------------------------------------------------------------------------------------------------------------------------|-----|
| <b>Table S9</b>   | Spin density values for selected atoms of coordinated flavonolate for the complexes $[\text{Ni}(\text{L})(\text{fla})]^+$ <b>1–3</b> and the radical intermediates $[\text{Ni}(\text{L})(\text{fla}^{\bullet})]^{2+}$ <b>1A–3A</b> .                                                                                                                                                                                                            | 22  |
| <b>Figure S8</b>  | HOMO and LUMO band gap energy profile diagram for $[\text{Ni}(\text{L1})(\text{fla}^{\bullet})]^{2+}$ <b>1A</b> , $[\text{Ni}(\text{L2})(\text{fla}^{\bullet})]^{2+}$ <b>2A</b> and $[\text{Ni}(\text{L3})(\text{fla}^{\bullet})]^{2+}$ <b>3A</b> , calculated at U-B3LYP combined correlation function and basis sets for metal atom LANL2DZ and 6-31G* basis sets for other non-metal atoms and acetonitrile as a solvent by the CPCM method. | 232 |
| <b>Table S10</b>  | Computed structural parameters and HOMO and LUMO energies and band gap energies for complexes <b>1A–3A</b> .                                                                                                                                                                                                                                                                                                                                    | 24  |
| <b>Table S11</b>  | Computed bond angles [ $^{\circ}$ ] of complexes <b>1A–3A</b>                                                                                                                                                                                                                                                                                                                                                                                   | 25  |
| <b>Figure S9</b>  | The time course of absorbance of UV-Vis spectral band observed at 450 nm in the presence of $\text{O}_2$ in DMF solution of $[\text{Ni}(\text{L3})(\text{fla})]\text{ClO}_4$ <b>3</b> ( $1 \times 10^{-4}$ M) at $70^{\circ}\text{C}$ .                                                                                                                                                                                                         | 26  |
| <b>Figure S10</b> | <b>a)</b> UV-Vis spectral band observed in the presence of $\text{O}_2$ in DMF solution of $[\text{Ni}(\text{L1})(\text{fla})]\text{ClO}_4$ <b>1</b> ( $1 \times 10^{-4}$ M) at $70^{\circ}\text{C}$ ; <b>b)</b> The time course of absorbance at 444 nm and <b>c)</b> Plot of $1 + \ln\{(A_t - A_{\infty}) / (A_0 - A_{\infty})\}$ vs time for the band observed at 444 nm.                                                                    | 27  |
| <b>Figure S11</b> | <b>a)</b> UV-Vis spectral band observed in the presence of atmospheric $\text{O}_2$ in DMF solution of $[\text{Ni}(\text{L2})(\text{fla})]\text{ClO}_4$ <b>2</b> ( $1 \times 10^{-4}$ M) at $70^{\circ}\text{C}$ ; <b>b)</b> The time course of absorbance at 444 nm and <b>c)</b> Plot of $1 + \ln\{(A_t - A_{\infty}) / (A_0 - A_{\infty})\}$ vs time for the band observed at 444 nm.                                                        | 28  |
| <b>Figure S12</b> | GC-MS product analysis of the products of reactions between dioxygen ES model complexes $[\text{Ni}(\text{L})(\text{fla})]^+$ <b>1–3</b> in DMF at $70^{\circ}\text{C}$ to give rise to <b>(a)</b> salicylic acid [ $m/z$ (neg.): 136 ( $\text{M} - 2\text{H}$ ) $^{-}$ ] (20–60%), <b>(b)</b> benzoic acid [ $m/z$ (neg.): 122 ( $\text{M}^+$ )] (21–43%), as ultimate products ( <b>Scheme 2</b> ).                                           | 29  |
| <b>Table S12</b>  | GC-MS product analysis of the products of reactions between dioxygen ES model complexes $[\text{Ni}(\text{L})(\text{fla})]^+$ <b>1–3</b> ( $1.0 \times 10^{-3}$ M) in DMF solution at $70^{\circ}\text{C}$ .                                                                                                                                                                                                                                    | 29  |
| <b>Figure S13</b> | $^1\text{H}$ NMR spectra for the Ligand <b>L1</b>                                                                                                                                                                                                                                                                                                                                                                                               | 30  |
| <b>Figure S14</b> | $^{13}\text{C}$ NMR spectra for the Ligand <b>L1</b>                                                                                                                                                                                                                                                                                                                                                                                            | 31  |
| <b>Figure S15</b> | $^1\text{H}$ NMR spectra for the Ligand <b>L3</b>                                                                                                                                                                                                                                                                                                                                                                                               | 32  |
| <b>Figure S16</b> | $^{13}\text{C}$ NMR spectra for the Ligand <b>L3</b>                                                                                                                                                                                                                                                                                                                                                                                            | 33  |

|                   |                                                                                                                                                            |    |
|-------------------|------------------------------------------------------------------------------------------------------------------------------------------------------------|----|
| <b>Figure S17</b> | LC-MS of tris(2-pyridylmethyl)amine (tpa) <b>L1</b> in methanol solution ( $1 \times 10^{-3}$ M) at 25 °C                                                  | 34 |
| <b>Figure S18</b> | High Resolution Mass Spectra of tris( <i>N</i> -Et-benzimidazol-2-ylmethyl)amine (Et-ntb) <b>L3</b> in methanol solution ( $1 \times 10^{-3}$ M) at 25 °C. | 35 |
| <b>Figure S19</b> | High Resolution Mass Spectra of [Ni(L1)](ClO <sub>4</sub> ) <sub>2</sub> <b>1a</b> in acetonitrile solution ( $1 \times 10^{-3}$ M) at 25 °C.              | 36 |
| <b>Figure S20</b> | High Resolution Mass Spectra of [Ni(L2)](ClO <sub>4</sub> ) <sub>2</sub> <b>2a</b> in acetonitrile solution ( $1 \times 10^{-3}$ M) at 25 °C.              | 37 |
| <b>Figure S21</b> | High Resolution Mass Spectra of [Ni(L3)](ClO <sub>4</sub> ) <sub>2</sub> <b>3a</b> in acetonitrile solution ( $1 \times 10^{-3}$ M) at 25 °C.              | 38 |
| <b>Figure S22</b> | High Resolution Mass Spectra of [Ni(L1)(fla)]ClO <sub>4</sub> <b>1</b> in acetonitrile solution ( $1 \times 10^{-3}$ M) at 25 °C.                          | 39 |
| <b>Figure S23</b> | High Resolution Mass Spectra of [Ni(L2)(fla)]ClO <sub>4</sub> <b>2</b> in acetonitrile solution ( $1 \times 10^{-3}$ M) at 25 °C.                          | 40 |
| <b>Figure S24</b> | High Resolution Mass Spectra of [Ni(L3)(fla)]ClO <sub>4</sub> <b>3</b> in acetonitrile solution ( $1 \times 10^{-3}$ M) at 25 °C.                          | 41 |

## Supplementary Information

### Computed Structures

A Density Functional Theory (DFT) study has been performed at the computational level of U-B3LYP/6-31G\* exchange correlation functional on the Ni(II)-flavonolate complexes **1–3** to throw light on their unique structural features and stabilities and also to illustrate their reactivity towards dioxygen. The initial coordinates of **1** and **3** were taken from their single crystal X-ray structures and the calculated structures subjected to optimization. And the computed structural parameters of the optimized geometries (**Table 2, Fig. 2**) are in close agreement with those of the X-ray structures. Thus, the calculated Ni–N1 (**1**, 2.095; **3**, 2.084), Ni–N2 (**1**, 2.149; **3**, 2.260), Ni–N3 (**1**, 2.060; **3**, 2.063), and Ni–N4 bond lengths (**1**, 2.095; **3**, 2.087) are close to the experimental values. However, the calculated Ni–O1<sub>hydroxylate</sub> bond lengths (**1**, 2.044; **3**, 2.049 Å) are longer than the experimental bond lengths (**1**, 1.984(4); **3**, 1.962(5) Å) while the calculated Ni–O2<sub>carbonyl</sub> bond lengths (**1**, 2.113; **3**, 2.119 Å) are close to or slightly longer than the experimental bond lengths (**1**, 2.110(4); **3**, 2.144(6) Å). The calculated bond angles are close to the octahedral bond angles of 90° and 180°. So, the calculated structures and the structural parameters are valid and may be used to discuss the trends in bonding and reactivities. The small differences in the observed and computed bond parameters may be because the computations are performed in CH<sub>3</sub>CN as solvent medium. Also, we have calculated the structures of the other geometric isomer **1b–3b** (**Fig. 2**) for both the S = 0 and S = 1 spin states and the latter has energies lower than the former, as revealed by the three ligand field bands observed for the complexes (cf. below). In these octahedral structures the fla<sup>-</sup> possesses an orientation different from that in **1–3**. It may be noted that the X-ray structures of both the geometric isomers of [Ni(Me<sub>3</sub>TACN)(fla)]<sup>+</sup> have been reported.<sup>1</sup>

The computed molecular structure of **1** is similar to its X-ray structure with the octahedral NiN<sub>4</sub>O<sub>2</sub> chromophore being constituted by the pyridyl N3 (Ni–N3, 2.060 Å, **Table 1**) and amine N2 (Ni–N2, 2.149 Å) nitrogens of **L1** ligand and O1 (Ni–O1, 2.044 Å) and O2 (Ni–O2, 2.113 Å) atoms of flavonolate and the N1 (Ni–N1, 2.095 Å) and N4 (Ni–N4, 2.095 Å) pyridyl nitrogens of **L1** coordinated trans to each other at equal bond lengths. The calculated asymmetry ( $\Delta d$ ) in fla<sup>-</sup> binding is 0.069 Å while the observed value is 0.126 Å (cf. above). The computed structure of **2** is distorted octahedral, similar to that of **1**. Interestingly, the two 6-Me-pyridyl nitrogens N1 and N4 are located trans to each other at almost the same bond lengths (Ni–N1, 2.216; Ni–N4,

2.222). The Ni–N1, Ni–N4 and Ni–N2 bonds in **2** are longer than the corresponding Ni–N bonds in **1**, obviously due to steric hindrance of 6-Me group to coordination of pyridyl nitrogen; however, the Ni–N3 bond lengths are the same. The Ni–O1 bond in **2** (2.051 Å) is longer and the Ni–O2 bond is shorter (2.099 Å) than the respective Ni–O bonds in **1** (Ni–O1, 2.044; Ni–O2, 2.113 Å), with the asymmetry in coordination of flavonolate anion in **2** being lower than that in **1** ( $\Delta d$ : **1**, 0.069 Å; **2**, 0.048 Å). Thus, the incorporation of sterically hindering 6-methyl substituent on pyridyl ring decreases the electron density on Ni(II), resulting in weaker  $\pi$ -back bonding of (2)C=O bond and hence the lower  $\pi$ -delocalization in  $\text{fla}^-$  of **2**. However, there is no change observed in (2)C=O (**1**, 1.297; **2**, 1.297 Å), C1–C2 (**1**, 1.471; **2**, 1.467 Å), and C1–O1 (**1**, 1.342; **2**, 1.343 Å) bond lengths.

The calculated energies of HOMO and SOMOs (HOMO-1, HOMO-2/6) of all the four complexes are collected in **Table 2** (**Fig. S3, S4**). Interestingly, the doubly filled HOMO is localized on the coordinated  $\text{fla}^-$ , and is higher in energy than the SOMOs.<sup>1</sup> This non-Aufbau electronic configuration is expected of  $\pi$ -conjugated molecules like H( $\text{fla}$ ), conferring enhanced stabilities on them, and such HOMO-1–HOMO inversions have been observed previously (Ref 65). It may be noted that the HOMO-1 and HOMO-2 are made up of  $d_{x^2-y^2}$  ( $\sigma^*$ ) and  $d_{z^2}$  ( $\sigma^*$ ) orbitals respectively of Ni(II). The HOMO is a highly conjugated  $\pi$ -MO of  $\text{fla}^-$  while the LUMO is the unoccupied highly conjugated  $\pi^*$  orbital. The observed trend in HOMO energy, H( $\text{fla}$ ) (-6.002) < **2** (-5.613) < **1** (-5.582) < **3** (-5.508 eV), is the same as that in LUMO energy, **2** (-2.567) < **1** (-2.526) < **3** (-2.480 eV), and a plot of the values of the two energies is linear, reflecting that the 4N ligands influence the  $\pi$ -delocalization in  $\text{fla}^-$  and hence its dioxygenation. The calculated HOMO-LUMO energy gap (**Table 2, Fig. 3**) varies as, **1** (3.056) > **2** (3.045) > **3** (3.029 eV), which corresponds to the observed band maxima, **1** (441) ~ **2** (441) > **3** (446 nm), cf. below) of the  $\pi \rightarrow \pi^*$  transition in Ni(II)-bound  $\text{fla}^-$ . The trend in HOMO energy reflects that the replacement of pyridyl nitrogen donor in **1** by the more basic bzim nitrogen donor to obtain **3** enhances the  $\pi$ -back bonding of Ni(II) with  $\text{fla}^-$  enhances the  $\pi$ -delocalization and hence the asymmetry in  $\text{fla}^-$  ( $\Delta d(\text{exptl})$ : **1**, 0.126; **3**, 0.182 Å; cf. above), and raises the energies of both HOMO ( $\pi$ ) and LUMO ( $\pi^*$ ). Interestingly, the inclusion of sterically hindering 6-Me group on **1** to obtain **2** lowers the  $\pi$ -delocalization, decreases the energies of both LUMO and HOMO and hence the asymmetry in  $\text{fla}^-$  ( $\Delta d(\text{calc})$ : **1**, 0.067; **2**, 0.048 Å). Accordingly, HOMO-1 ( $d_{x^2-y^2}$ ) and

HOMO–2 ( $d_z^2$ ) of **1** are inverted in **2**. It is expected that the higher the energy of HOMO the easier is the removal of electron from HOMO and hence more facile is the oxidation of  $\text{fla}^-$ .

In complexes **1** and **3**, the  $d_{x^2-y^2}$  orbital is oriented towards N1N2N3O2 donor set while the  $d_z^2$  orbital is oriented towards N3O2 donor atoms. On the other hand, in **2**, interestingly, the  $d_z^2$  orbital is oriented towards N2O1 donors while the  $d_{x^2-y^2}$  orbital is oriented towards N1N3N4O1 donor set. The orientation of  $d_z^2$  orbital towards N3O2 donor atoms for **1** and **3** is in

$$\frac{(\sum \text{axial bonds})/2}{(\sum \text{equatorial bonds})/4}$$

accordance with the highest value of  $T' = \frac{(\sum \text{axial bonds})/2}{(\sum \text{equatorial bonds})/4}$  calculated (**1**, 1.012; **3**, 1.003; **Table 2**) while the  $T'$  values are lower for the alternative orientations towards N2N4 (**1**, 1.009; **3**, 0.993) and N2O1 (**1**, 0.979; **3**, 1.003). We have already shown that for octahedral Mn(II) complexes with  $t_{2g}^3e_g^2$  configuration, the degeneracy of  $e_g$  orbitals is lifted up and whether  $d_z^2$  or  $d_{x^2-y^2}$  forms the higher energy HOMO–1 orbital is determined by the value of  $T'$  and that the separation between the two orbitals vary in energy. However, for the computed structures, the  $T'$  values (**Table 2**) predict that  $d_z^2$  prefers N2O1 for **1** and **3**, but actually it prefers N3O2 donors. Similarly,  $d_z^2$  in **2** should prefer to orient along N1N4 donors, but it is found to be oriented towards N2O1. Such inconsistencies may be traced to the computations performed in  $\text{CH}_3\text{CN}$  as solvent.

**Table S1.** Structure refinement details for **1** and **3**.

|                                      | <b>1</b>                                                            | <b>3</b>                                                            |
|--------------------------------------|---------------------------------------------------------------------|---------------------------------------------------------------------|
| Sum formula                          | C <sub>33</sub> H <sub>27</sub> Cl N <sub>4</sub> Ni O <sub>9</sub> | C <sub>45</sub> H <sub>42</sub> Cl N <sub>7</sub> Ni O <sub>7</sub> |
| Formula weight                       | 717.74                                                              | 887.01                                                              |
| Temperature (K)                      | 296(2)                                                              | 296(2)                                                              |
| Wavelength (Å)                       | 0.71073                                                             | 0.71073                                                             |
| Crystal system                       | triclinic                                                           | triclinic                                                           |
| Space group                          | P-1                                                                 | P-1                                                                 |
| a(Å)                                 | 8.7410(18)                                                          | 10.101(5)                                                           |
| b(Å)                                 | 11.275(3)                                                           | 14.304(7)                                                           |
| c(Å)                                 | 18.489(4)                                                           | 15.831(8)                                                           |
| α(°)                                 | 79.476(15)                                                          | 97.26(3)                                                            |
| β(°)                                 | 79.222(13)                                                          | 96.87(3)                                                            |
| γ(°)                                 | 68.785(14)                                                          | 109.19(3)                                                           |
| Volume (Å <sup>3</sup> )             | 1655.6(6)                                                           | 2110.9(19)                                                          |
| Z                                    | 2                                                                   | 2                                                                   |
| D <sub>x</sub> (g.cm <sup>-3</sup> ) | 1.440                                                               | 1.396                                                               |
| Reflections collected                | 8610                                                                | 10823                                                               |
| R indices (all data)                 | 0.0875, wR <sub>2</sub> =0.3004                                     | 0.1307, wR <sub>2</sub> =0.3920                                     |



**Table S2.** Selected bond angles [°] for **1** and **3**.

| <b>Bond angles/°</b> | <b>1</b>   | <b>3</b>  |
|----------------------|------------|-----------|
| N1–Ni–N2             | 80.38(2)   | 78.57(2)  |
| N1–Ni–N3             | 93.19(17)  | 89.06(3)  |
| N1–Ni–N4             | 162.13(2)  | 156.14(3) |
| N1–Ni–O1             | 95.58(19)  | 105.01(2) |
| N1–Ni–O2             | 91.72(16)  | 89.26(2)  |
| N2–Ni–N3             | 82.80(19)  | 80.93(3)  |
| N2–Ni–N4             | 82.11(2)   | 78.76(2)  |
| N2–Ni–O1             | 175.88(18) | 175.72(2) |
| N2–Ni–O2             | 97.52(17)  | 100.89(2) |
| N3–Ni–N4             | 88.14(18)  | 94.62(3)  |
| N3–Ni–O1             | 98.27(17)  | 96.68(2)  |
| N3–Ni–O2             | 175.06(16) | 177.23(2) |
| N4–Ni–O1             | 101.87(2)  | 97.97(2)  |
| N4–Ni–O2             | 87.03(18)  | 87.81(3)  |
| O1–Ni–O2             | 81.76(15)  | 81.64(2)  |

CCDC: 2039217 for complex [Ni(L1)(fla)](ClO<sub>4</sub>) **1**

CCDC: 1956984 for complex [Ni(L3)(fla)](ClO<sub>4</sub>) **3**

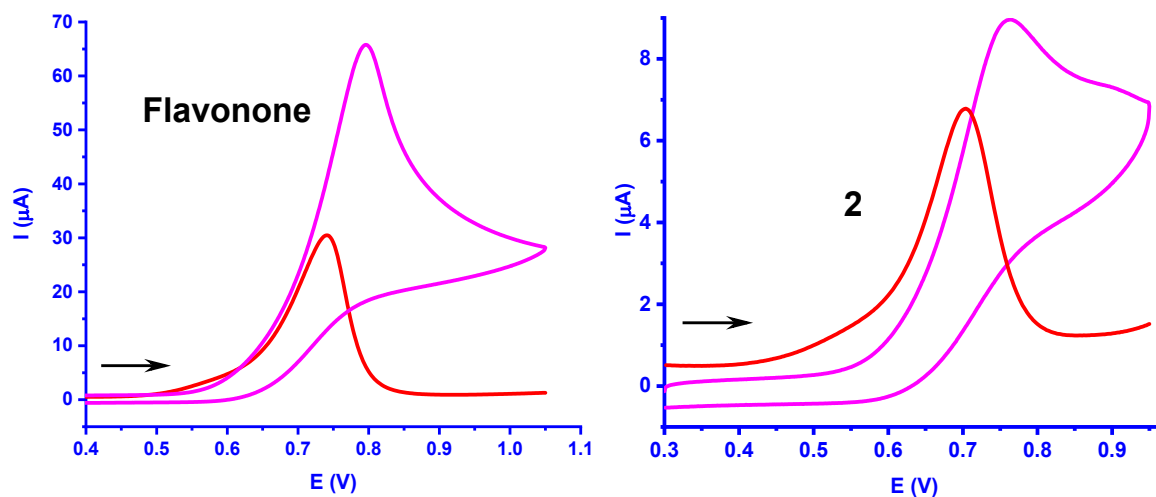

**Figure S1.** Cyclic voltammograms and DPV of flavonone ligand ( $1.0 \times 10^{-3}$  M) and complex **2** in DMF at 25 °C. Conditions: supporting electrolyte, 0.1 M TBAP; Scan rate, CV,  $50 \text{ mVs}^{-1}$  and DPV,  $2 \text{ mVs}^{-1}$  for all complexes, reference electrode, Calomel electrode; working electrode, Glassy carbon; Counter electrode, platinum wire.

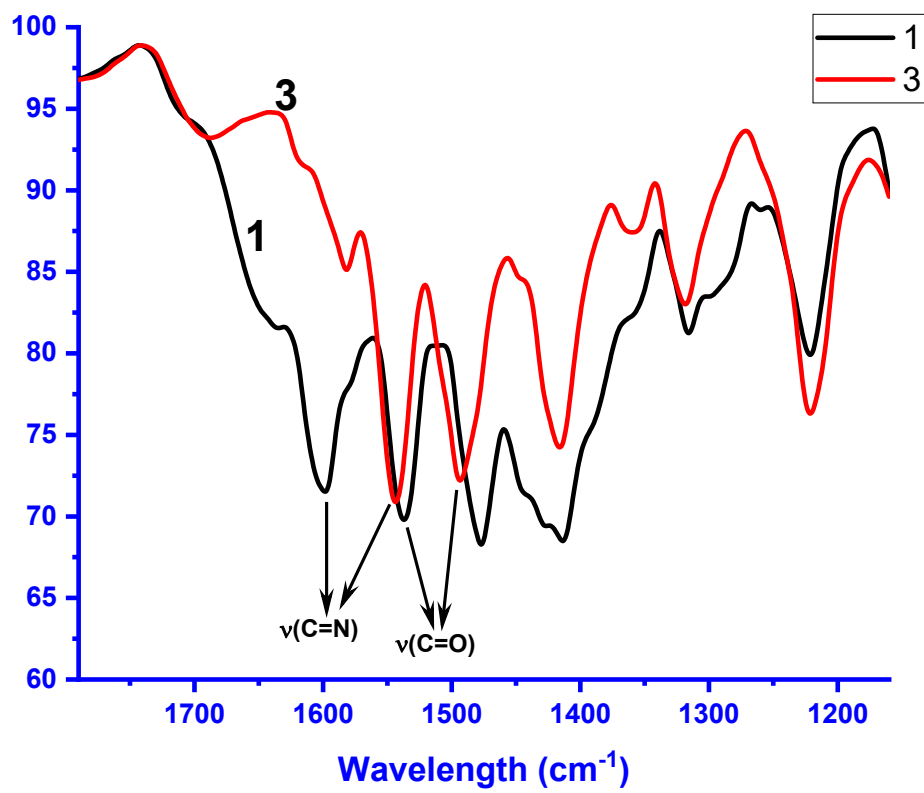

Figure S2. IR spectra of complexes 1 and 3.

**Table S3.** Computed structural parameters and energy gap values of the geometric isomers **1b–3b**

| Bond lengths/Å    | 1b                          |                             | 2b                          |                             | 3b                          |                             |
|-------------------|-----------------------------|-----------------------------|-----------------------------|-----------------------------|-----------------------------|-----------------------------|
|                   | *HS                         | #LS                         | *HS                         | #LS                         | *HS                         | #LS                         |
| Ni1–N1            | 2.102                       | 1.934                       | 2.220                       | 1.998                       | 2.092                       | 1.929                       |
| Ni1–N2            | 2.151                       | 2.453                       | 2.118                       | 2.388                       | 2.265                       | 2.643                       |
| Ni1–N3            | 2.069                       | 1.939                       | 2.071                       | 1.945                       | 2.056                       | 1.912                       |
| Ni1–N4            | 2.102                       | 1.935                       | 2.220                       | 1.991                       | 2.092                       | 1.927                       |
| Ni–O1             | 2.049                       | 2.395                       | 2.058                       | 2.657                       | 2.054                       | 2.428                       |
| Ni1–O2            | 2.041                       | 1.896                       | 2.036                       | 1.902                       | 2.048                       | 1.896                       |
| O1–C1             | 1.344                       | 1.294                       | 1.343                       | 1.286                       | 1.289                       | 1.289                       |
| O2–C2             | 1.311                       | 1.357                       | 1.312                       | 1.353                       | 1.351                       | 1.351                       |
| C1–C2             | 1.463                       | 1.471                       | 1.459                       | 1.469                       | 1.473                       | 1.473                       |
|                   |                             |                             |                             |                             |                             |                             |
| Total energy (eV) | -5.136<br>× 10 <sup>4</sup> | -5.136<br>× 10 <sup>4</sup> | -5.350<br>× 10 <sup>4</sup> | -5.350<br>× 10 <sup>4</sup> | -6.852<br>× 10 <sup>4</sup> | -6.852<br>× 10 <sup>4</sup> |
| HOMO (eV)         | -7.3607                     | -7.4374                     | -7.4314                     | -7.4423                     | -7.0407                     | -7.0627                     |
| LUMO (eV)         | -4.3607                     | -4.3495                     | -4.4262                     | -4.4382                     | -4.0387                     | -3.8885                     |
| Band gap (eV)     | 2.9941                      | 3.0879                      | 3.0052                      | 3.0041                      | 3.0020                      | 3.1742                      |

\*HS, High Spin (S = 1); #LS, Low Spin (S = 0).

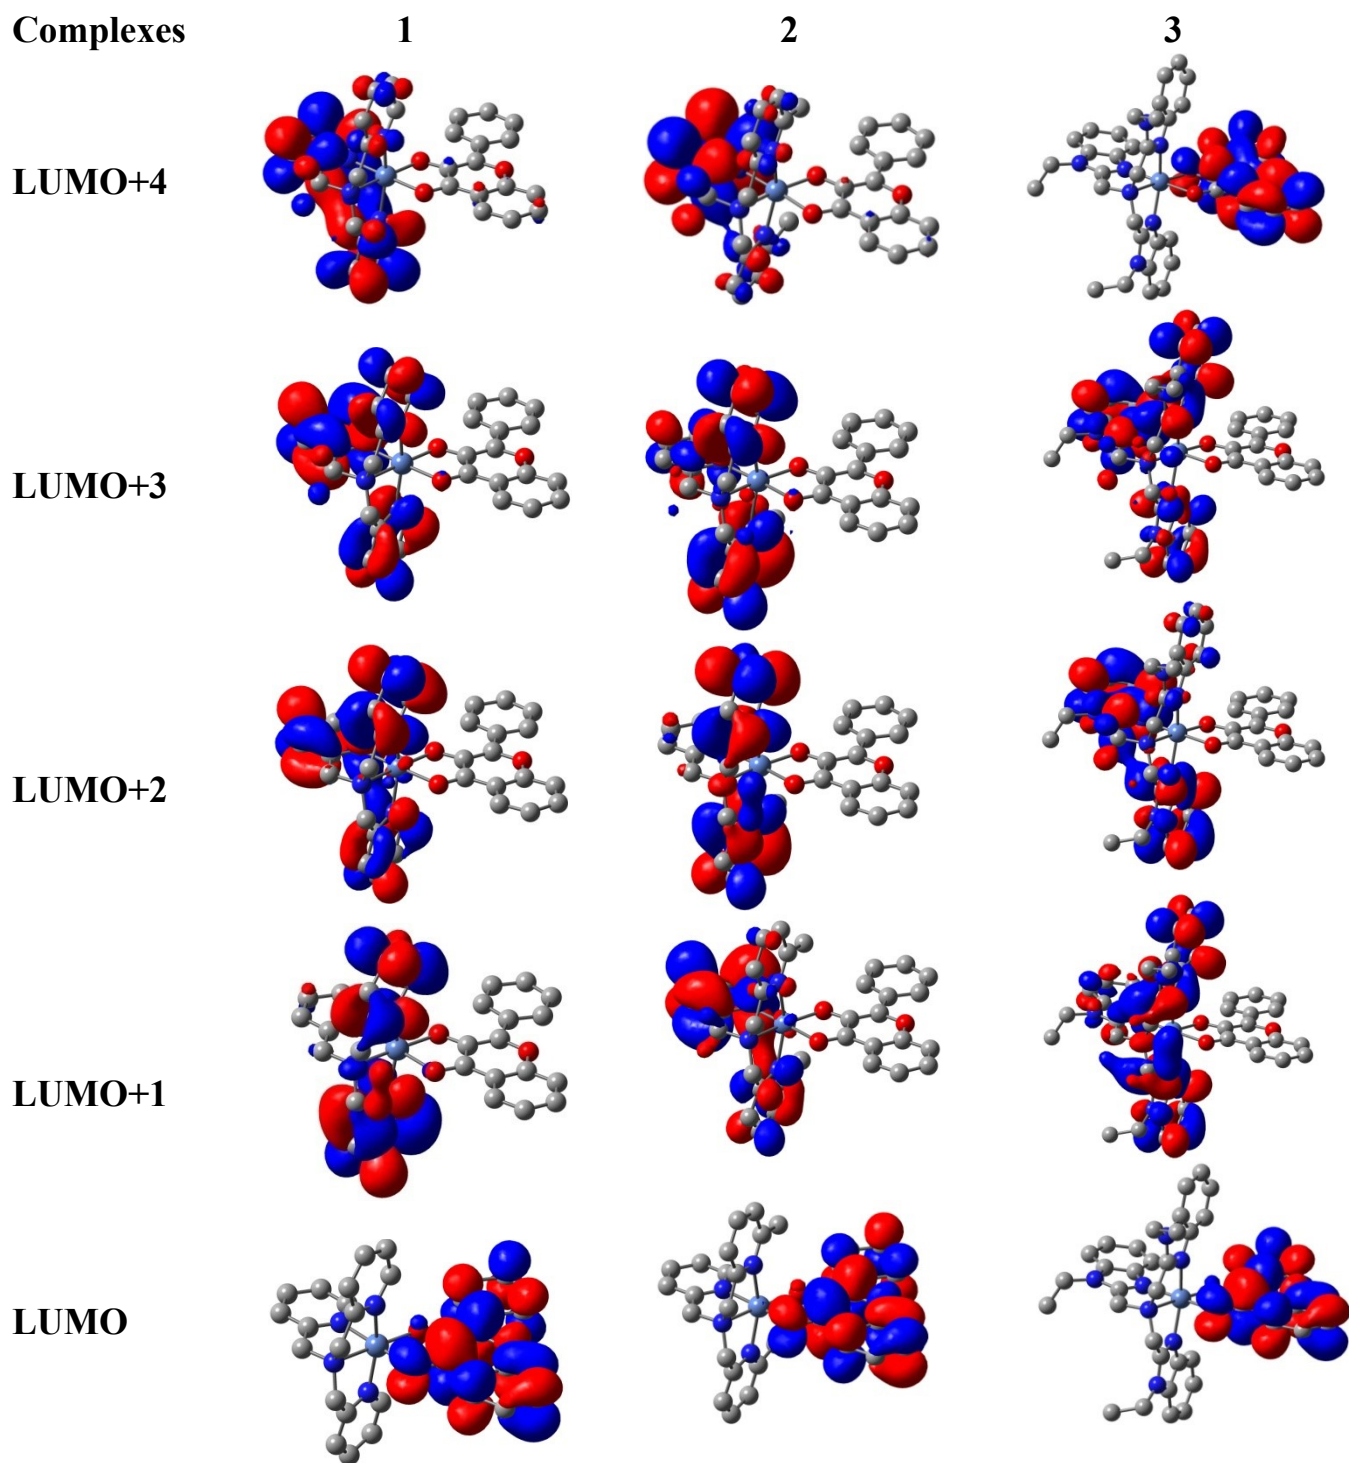

**Figure S3.** Computed frontier molecular orbitals (LUMO) of complexes  $[\text{Ni}(\text{L1})(\text{fla})]^+$  **1**,  $[\text{Ni}(\text{L2})(\text{fla})]^+$  **2** and  $[\text{Ni}(\text{L3})(\text{fla})]^+$  **3**.

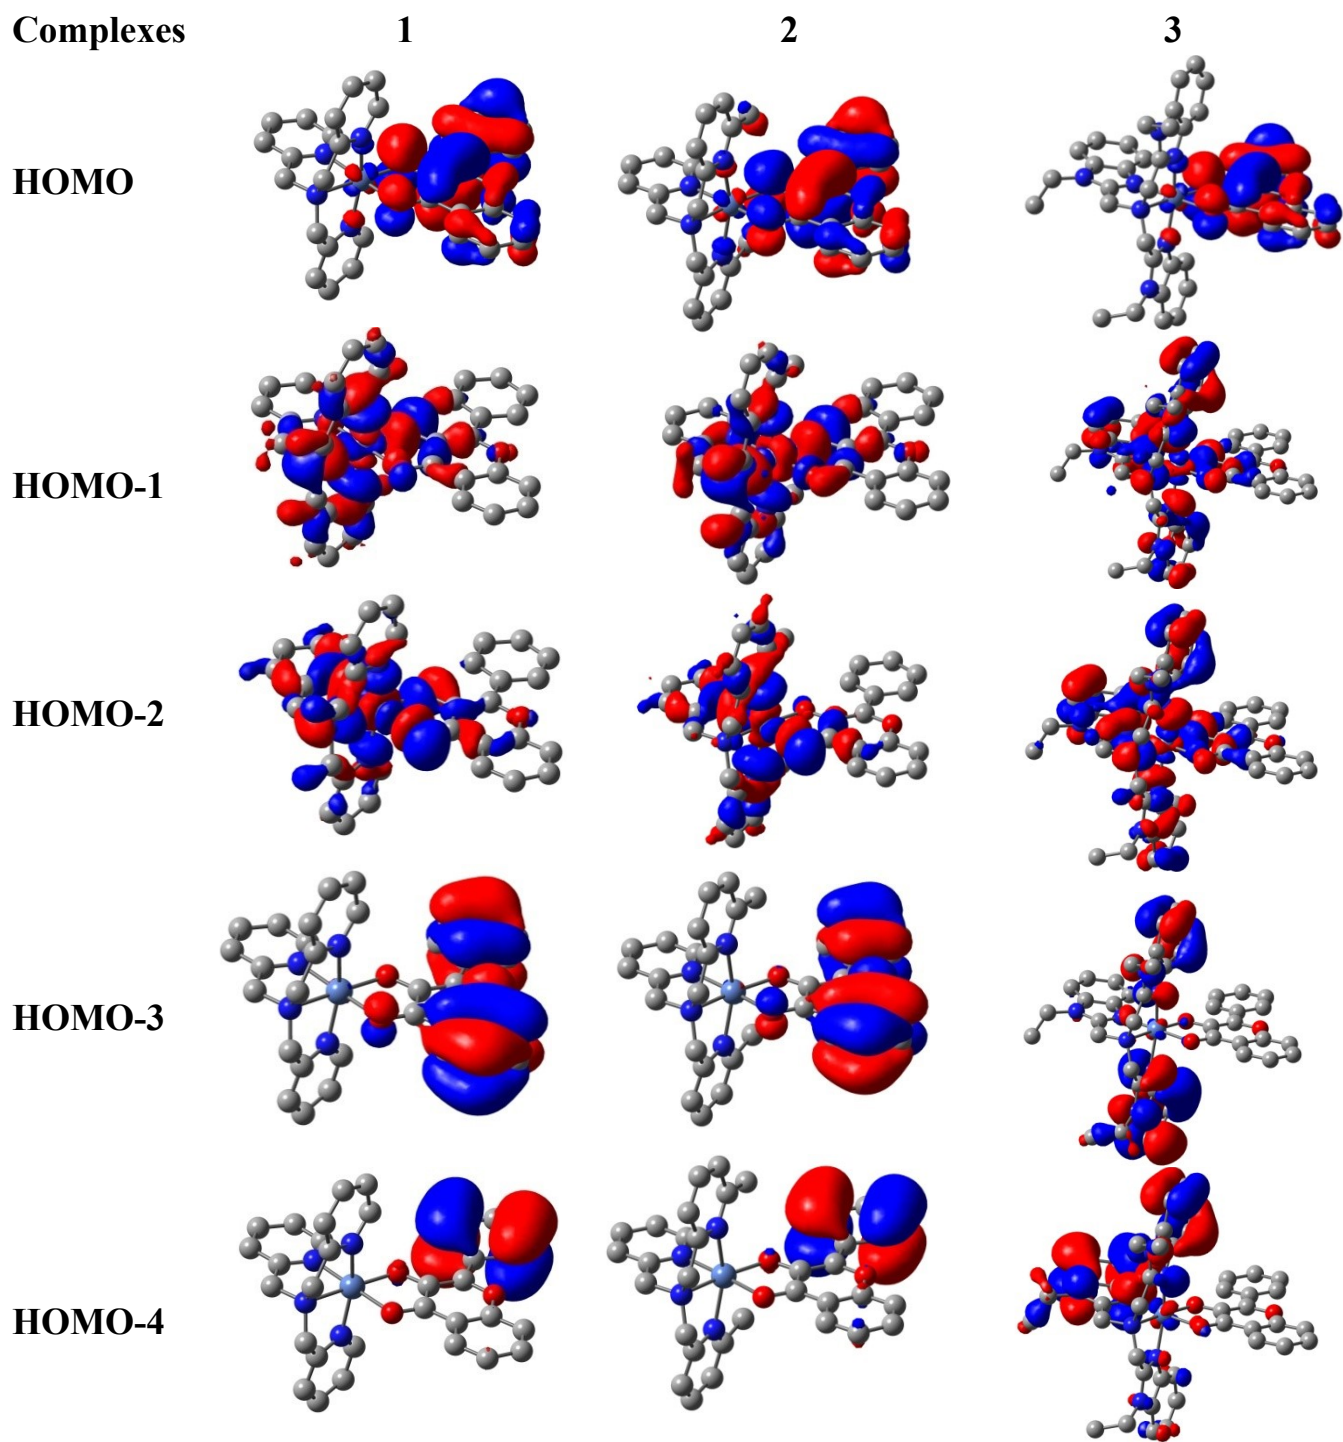

**Figure S4.** Computed frontier molecular orbitals (HOMO) of complexes  $[\text{Ni}(\text{L1})(\text{fla})]^+$  **1**,  $[\text{Ni}(\text{L2})(\text{fla})]^+$  **2** and  $[\text{Ni}(\text{L3})(\text{fla})]^+$  **3**.

**Table S4.** Computed HOMO energies for the complexes **1–3**.

| MOs (eV) | <b>1</b>             | <b>2</b>             | <b>3</b>             |
|----------|----------------------|----------------------|----------------------|
| HOMO     | -5.582               | -5.613               | -5.508               |
| HOMO-1   | -6.439 ( $x^2-y^2$ ) | -6.644 ( $z^2$ )     | -6.572 ( $x^2-y^2$ ) |
| HOMO-2   | -6.717 ( $z^2$ )     | -6.832 ( $x^2-y^2$ ) | -6.606               |
| HOMO-3   | -6.997               | -7.025               | -6.690               |
| HOMO-4   | -7.170               | -7.190               | -6.734               |
| HOMO-5   | -7.583               | -7.360               | -6.804               |
| HOMO-6   | -7.604               | -7.438               | -6.827 ( $z^2$ )     |
| HOMO-7   | -7.645               | -7.623               | -6.871               |
| HOMO-8   | -7.787               | -7.634               | -6.930               |
| HOMO-9   | -7.837(xy)           | -7.711               | -6.974               |
| HOMO-10  | -7.859               | -7.833(yz, xz)       | -7.151               |
| HOMO-11  | -8.289(yz, xz)       | -8.220               | -7.585               |
| HOMO-12  | -8.334               | -8.345(xy)           | -7.685               |
| HOMO-13  | -8.366(yz, xz)       | -8.362               | -7.793(xy)           |
| HOMO-14  | -8.633               | -8.546               | -8.407(yz, xz)       |
| HOMO-15  | -8.714               | -8.655               | -8.474(yz, xz)       |
| HOMO-16  | -8.985               | -9.010               | -8.558               |

**Table S5.** Torsion angles [°] **1–3**.

| <b>C1-C3-C4-C5</b> | <b>Experimental</b> | <b>Calculated</b> |
|--------------------|---------------------|-------------------|
| <b>1</b>           | 1.050(9)            | 0.279             |
| <b>2</b>           | -                   | -0.005            |
| <b>3</b>           | -5.480(13)          | -5.230            |

**Table S6.** Computed bond angles [°] of complexes **1–3**

| <b>Bond angles/°</b> | <b>1</b> | <b>2</b> | <b>3</b> |
|----------------------|----------|----------|----------|
| N1–Ni–N2             | 81.3240  | 80.0806  | 79.8494  |
| N1–Ni–N3             | 91.0590  | 88.6330  | 89.9420  |
| N1–Ni–N4             | 162.2969 | 160.2493 | 157.9899 |
| N1–Ni–O1             | 98.6281  | 99.8225  | 100.6478 |
| N1–Ni–O2             | 89.1680  | 90.8504  | 88.2390  |
| N2–Ni–N3             | 83.3965  | 84.4062  | 81.6066  |
| N2–Ni–N4             | 81.3875  | 80.2392  | 79.0045  |
| N2–Ni–O1             | 178.2134 | 172.3422 | 175.8644 |
| N2–Ni–O2             | 97.4691  | 92.1219  | 95.3606  |
| N3–Ni–N4             | 90.7145  | 87.8136  | 92.7174  |
| N3–Ni–O1             | 98.3900  | 103.2513 | 102.4805 |
| N3–Ni–O2             | 179.1293 | 176.5272 | 176.7017 |
| N4–Ni–O1             | 98.5328  | 99.9039  | 100.0091 |
| N4–Ni–O2             | 89.3237  | 91.5255  | 87.7174  |
| O1–Ni–O2             | 80.7444  | 80.2207  | 80.5677  |



**Table S7.** Computed bond angles [°] of geometric isomers **1b–3b**.

| Bond angles/° | <b>1b</b>  |            | <b>2b</b>  |            | <b>3b</b>  |            |
|---------------|------------|------------|------------|------------|------------|------------|
|               | <b>*HS</b> | <b>#LS</b> | <b>*HS</b> | <b>#LS</b> | <b>*HS</b> | <b>#LS</b> |
| N1–Ni–N2      | 81.576     | 82.210     | 80.470     | 81.752     | 79.581     | 78.832     |
| N1–Ni–N3      | 89.716     | 90.395     | 87.302     | 90.278     | 89.687     | 89.912     |
| N1–Ni–N4      | 163.105    | 163.994    | 160.633    | 164.940    | 159.106    | 157.061    |
| N1–Ni–O1      | 98.419     | 97.826     | 99.670     | 93.246     | 100.069    | 100.002    |
| N1–Ni–O2      | 90.013     | 89.876     | 91.855     | 90.514     | 89.106     | 89.186     |
| N2–Ni–N3      | 83.242     | 79.233     | 83.956     | 81.458     | 81.623     | 76.454     |
| N2–Ni–N4      | 81.585     | 82.192     | 80.475     | 83.225     | 79.654     | 78.861     |
| N2–Ni–O1      | 177.543    | 179.663    | 172.480    | 161.577    | 174.007    | 176.370    |
| N2–Ni–O2      | 94.963     | 100.907    | 90.853     | 90.047     | 91.673     | 98.366     |
| N3–Ni–N4      | 89.657     | 90.204     | 87.287     | 88.532     | 89.572     | 90.030     |
| N3–Ni–O1      | 99.214     | 100.431    | 103.564    | 116.436    | 104.368    | 107.037    |
| N3–Ni–O2      | 178.206    | 179.710    | 174.808    | 171.265    | 173.297    | 174.818    |
| N4–Ni–O1      | 98.346     | 97.793     | 99.675     | 100.722    | 100.338    | 101.934    |
| N4–Ni–O2      | 90.087     | 89.564     | 91.858     | 88.443     | 89.206     | 88.814     |
| O1–Ni–O2      | 82.580     | 79.43      | 81.628     | 72.199     | 82.336     | 78.144     |

\*HS, High Spin (S = 1); #LS, Low Spin (S = 0).

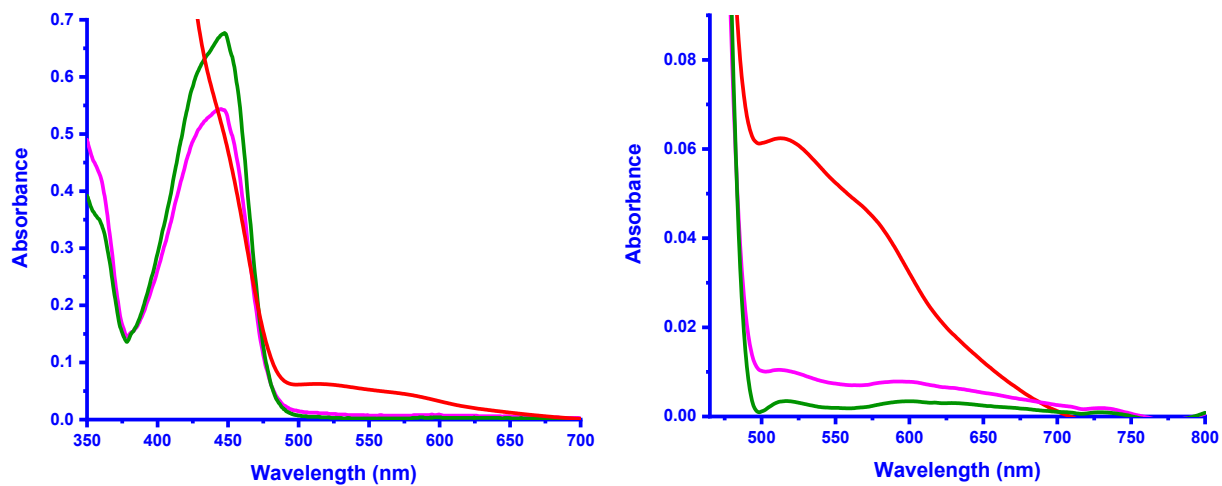

**Figure S5.** Spectral changes of **3** ( $1.4 \times 10^{-4}$  M) in the presence of NBT<sup>2+</sup> ( $3.0 \times 10^{-4}$  M) (red) in DMF at 70 °C under O<sub>2</sub> (pink) and N<sub>2</sub> (green).

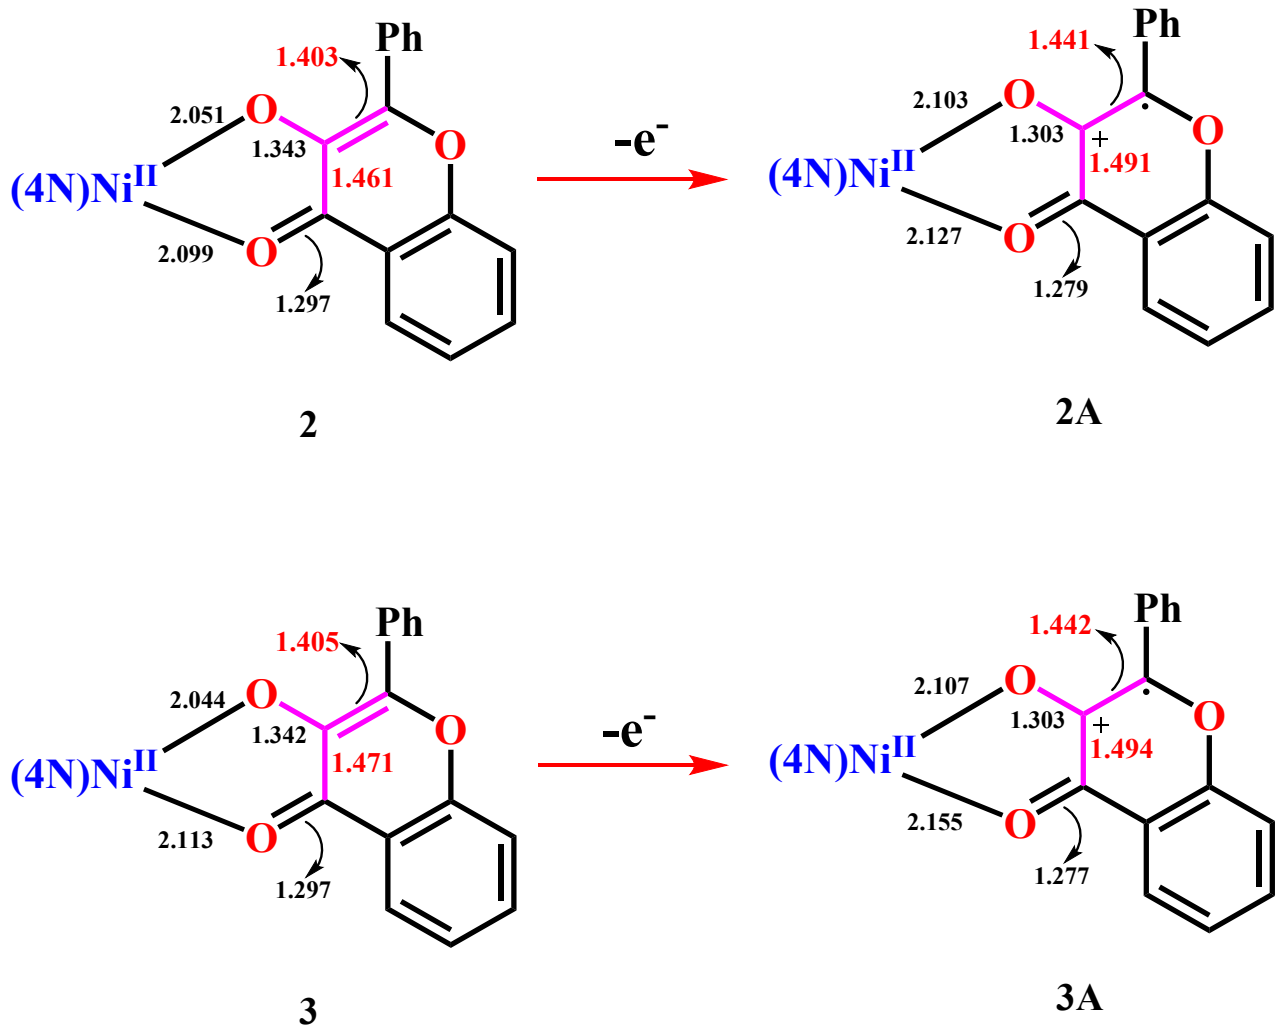

**Scheme S1.** Changes in bond length upon removal of an electron from Ni(II)-bound flavonolate in 2–3 to form the radical 2A–3A.

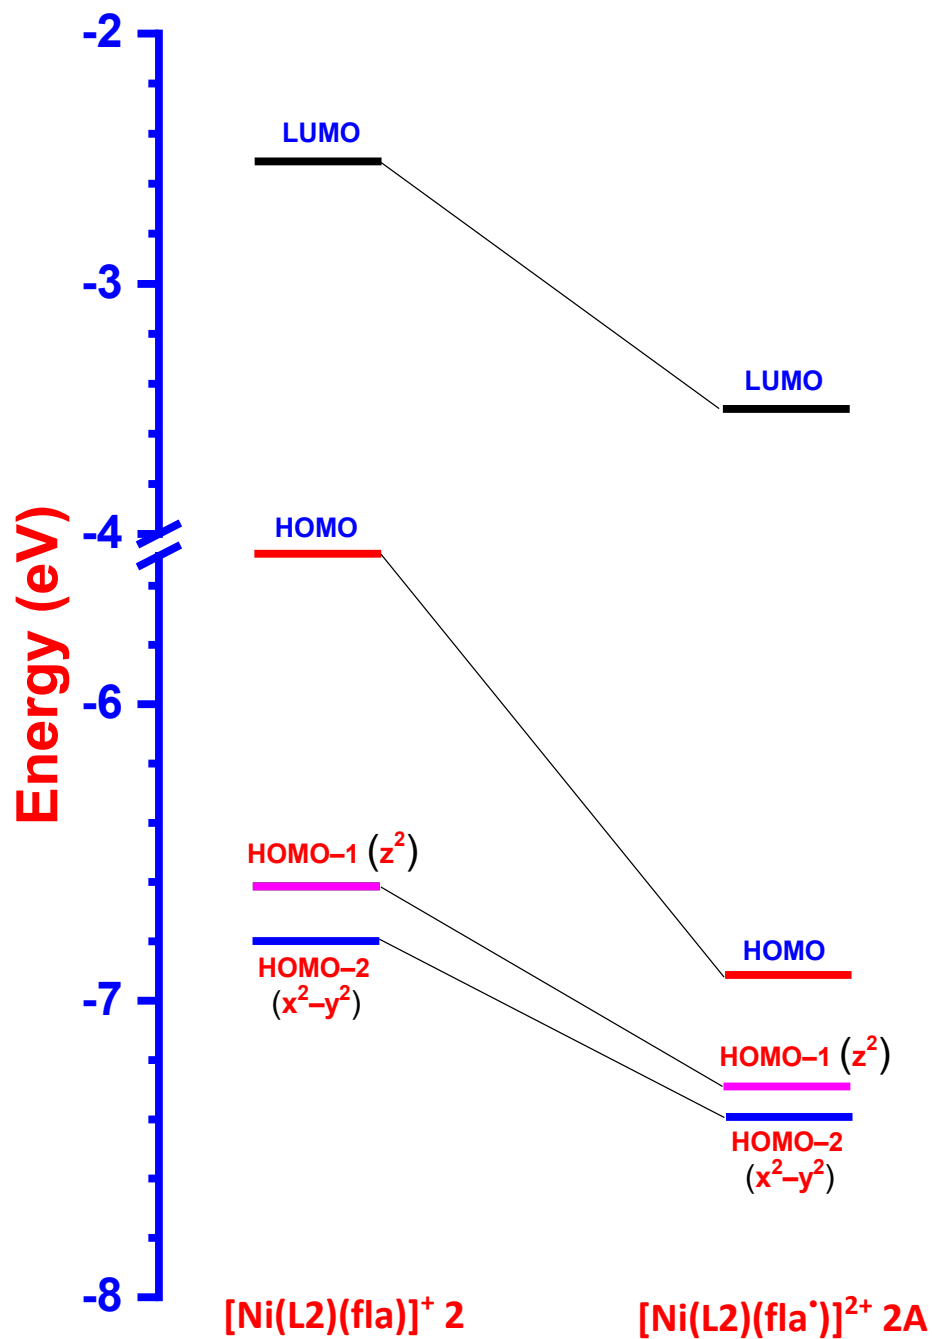

Figure S6. HOMO and LUMO energy profile diagram for the complexes **2** and **2A**

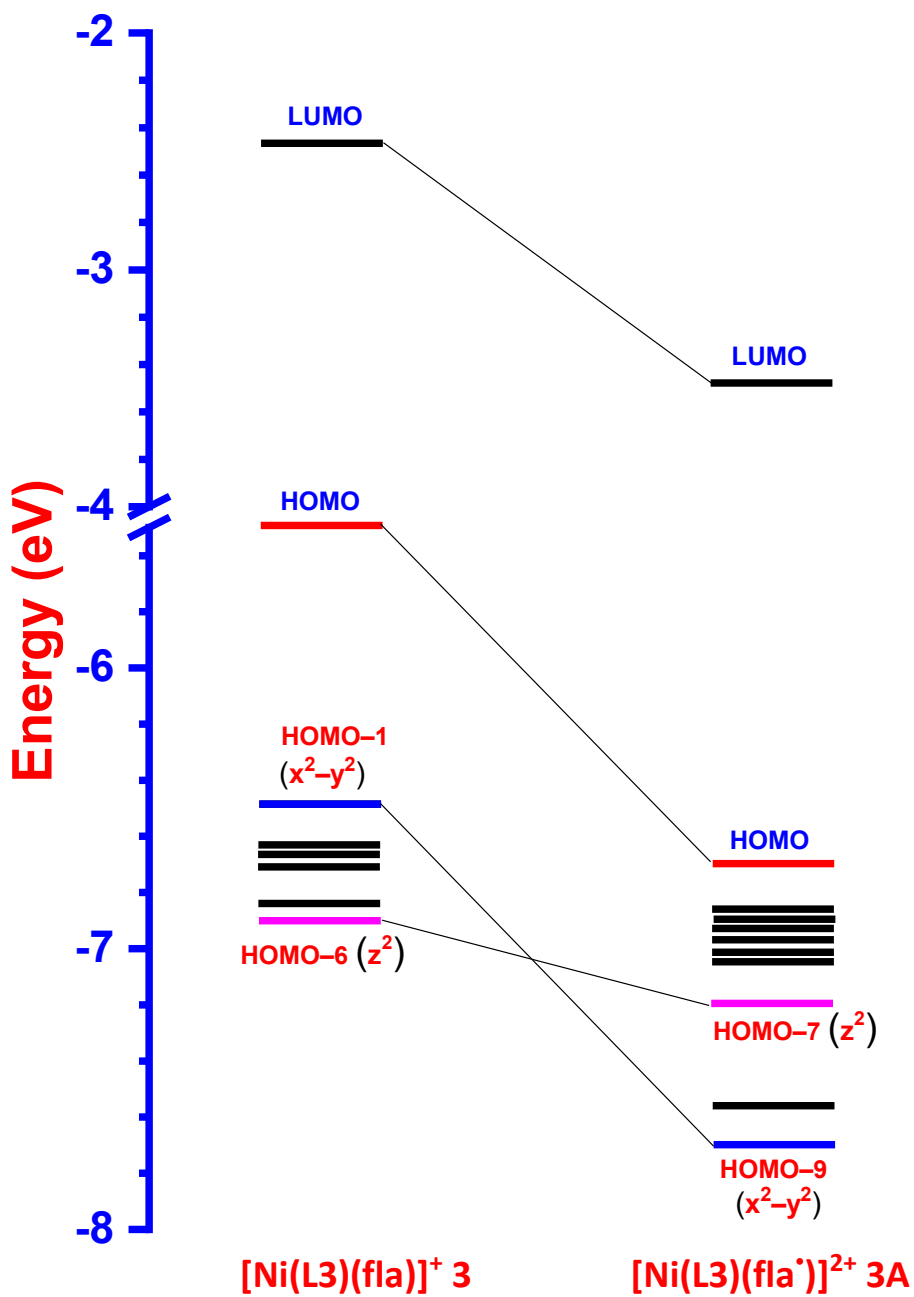

Figure S7. HOMO and LUMO energy profile diagram for the complexes 3 and 3A

**Table S8.** Important bond lengths (Å) of coordinated flavonolate for the complexes [Ni(L)(fla)]<sup>+</sup> **1–3** and the radical intermediates [Ni(L)(fla<sup>•</sup>)]<sup>2+</sup> **1A–3A**.

| Computed species | Bond lengths/Å |       |       |       |       |       |
|------------------|----------------|-------|-------|-------|-------|-------|
|                  | Ni–O1          | Ni–O2 | C2=O2 | C1–O1 | C1–C2 | C1–C3 |
| <b>1</b>         | 2.044          | 2.113 | 1.297 | 1.342 | 1.471 | 1.404 |
| <b>1A</b>        | 2.099          | 2.146 | 1.279 | 1.303 | 1.494 | 1.442 |
| <b>2</b>         | 2.051          | 2.099 | 1.297 | 1.343 | 1.467 | 1.403 |
| <b>2A</b>        | 2.103          | 2.127 | 1.279 | 1.303 | 1.491 | 1.441 |
| <b>3</b>         | 2.049          | 2.119 | 1.295 | 1.341 | 1.473 | 1.405 |
| <b>3A</b>        | 2.107          | 2.155 | 1.277 | 1.303 | 1.494 | 1.442 |

**Table S9.** Spin density values for selected atoms of coordinated flavonolate for the complexes [Ni(L)(fla)]<sup>+</sup> **1–3** and the radical intermediates [Ni(L)(fla<sup>•</sup>)]<sup>2+</sup> **1A–3A**.

| Spin Densities | Ni    | O1    | O2    | C1    | C2     | C3     |
|----------------|-------|-------|-------|-------|--------|--------|
| <b>1</b>       | 1.628 | 0.063 | 0.054 | 0.002 | -0.003 | -0.005 |
| <b>1A</b>      | 1.616 | 0.375 | 0.147 | 0.108 | 0.007  | 0.216  |
| <b>2</b>       | 1.645 | 0.054 | 0.053 | 0.003 | -0.003 | -0.005 |
| <b>2A</b>      | 1.626 | 0.382 | 0.143 | 0.099 | 0.009  | 0.216  |
| <b>3</b>       | 1.660 | 0.066 | 0.054 | 0.003 | -0.003 | -0.006 |
| <b>3A</b>      | 1.650 | 0.384 | 0.146 | 0.096 | 0.003  | 0.228  |

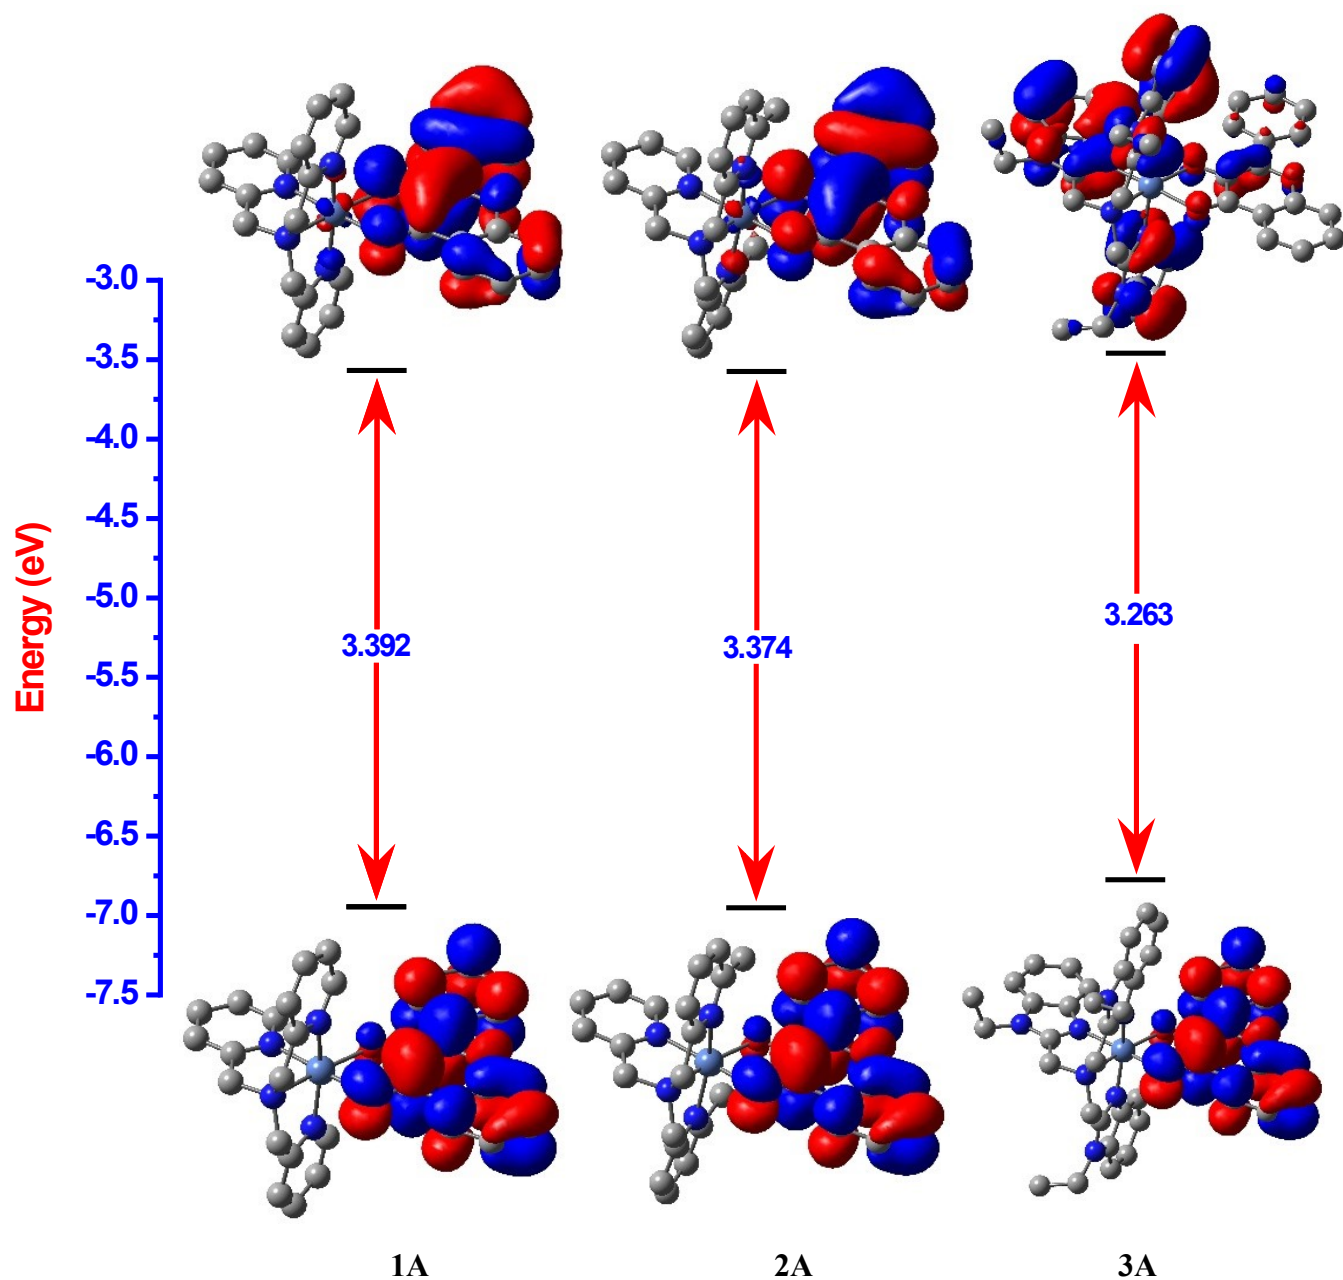

**Figure S8.** HOMO and LUMO band gap energy profile diagram for  $[\text{Ni}(\text{L1})(\text{fla}')^{2+}]$  **1A**,  $[\text{Ni}(\text{L2})(\text{fla}')^{2+}]$  **2A** and  $[\text{Ni}(\text{L3})(\text{fla}')^{2+}]$  **3A**, calculated at U-B3LYP combined correlation function and basis sets for metal atom LANL2DZ and 6-31G\* basis sets for other non-metal atoms and acetonitrile as a solvent by the CPCM method.

**Table S10.** Computed structural parameters and HOMO and LUMO energies and band gap energies for complexes **1A–3A**

| <b>Bond lengths/Å</b> | <b>1A</b>            | <b>2A</b>            | <b>3A</b>            |
|-----------------------|----------------------|----------------------|----------------------|
| Ni–N1                 | 2.080                | 2.177                | 2.061                |
| Ni–N2                 | 2.111                | 2.088                | 2.205                |
| Ni–N3                 | 2.045                | 2.051                | 2.043                |
| Ni–N4                 | 2.082                | 2.177                | 2.061                |
| Ni–O1                 | 2.099                | 2.103                | 2.107                |
| Ni–O2                 | 2.146                | 2.127                | 2.155                |
| O1–C1                 | 1.303                | 1.303                | 1.303                |
| O2–C2                 | 1.279                | 1.279                | 1.277                |
| C1–C2                 | 1.494                | 1.491                | 1.494                |
| C1–C3                 | 1.442                | 1.441                | 1.442                |
| Total energy (eV)     | $-5.136 \times 10^4$ | $-5.350 \times 10^4$ | $-6.851 \times 10^4$ |
| HOMO (eV)             | -6.938               | -6.934               | -6.754               |
| LUMO (eV)             | -3.545               | -3.559               | -3.491               |
| Band gap (eV)         | 3.392                | 3.374                | 3.263                |



**Table S11.** Computed bond angles [°] of complexes **1A–3A**

| Bond angles/°                                   | 1A       | 2A       | 3A       |
|-------------------------------------------------|----------|----------|----------|
| N1–Ni–N2                                        | 82.3268  | 81.6981  | 80.998   |
| N1–Ni–N3                                        | 91.5634  | 89.9963  | 92.192   |
| N1–Ni–N4                                        | 164.0711 | 163.2898 | 160.477  |
| N1–Ni–O1                                        | 97.1919  | 98.1126  | 98.4029  |
| N1–Ni–O2                                        | 88.8852  | 89.6913  | 87.2496  |
| N2–Ni–N3                                        | 84.8385  | 85.2370  | 83.4283  |
| N2–Ni–N4                                        | 82.3673  | 81.6578  | 80.8129  |
| N2–Ni–O1                                        | 174.3929 | 170.4035 | 171.4985 |
| N2–Ni–O2                                        | 96.5932  | 92.7246  | 93.8604  |
| N3–Ni–N4                                        | 91.4302  | 90.0953  | 92.7198  |
| N3–Ni–O1                                        | 100.7641 | 104.3594 | 105.0731 |
| N3–Ni–O2                                        | 178.5457 | 177.9615 | 177.2860 |
| N4–Ni–O1                                        | 97.6088  | 98.0488  | 98.5323  |
| N4–Ni–O2                                        | 88.5118  | 89.6249  | 86.9523  |
| O1–Ni–O2                                        | 77.8052  | 77.6791  | 77.6380  |
|                                                 |          |          |          |
| <b>Torsion angles<br/>[°]<br/>(C1–C3–C4–C5)</b> | 1.678    | -0.004   | -1.182   |

**Figure S9.** The time course of absorbance of UV-Vis band observed at 450 nm in the presence of O<sub>2</sub> in DMF solution of [Ni(L3)(fla)]ClO<sub>4</sub> **3** ( $1 \times 10^{-4}$  M) at 70 °C.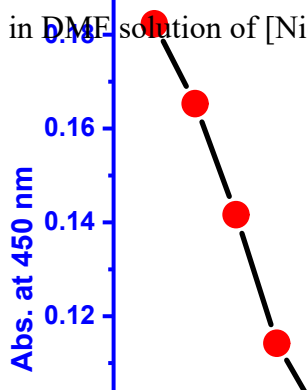

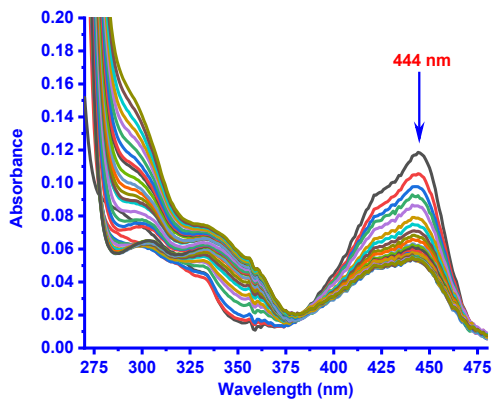

(a)

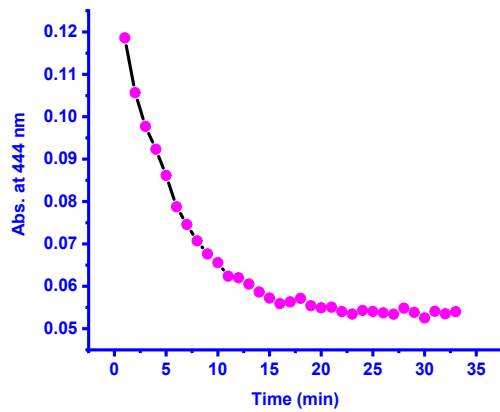

(b)

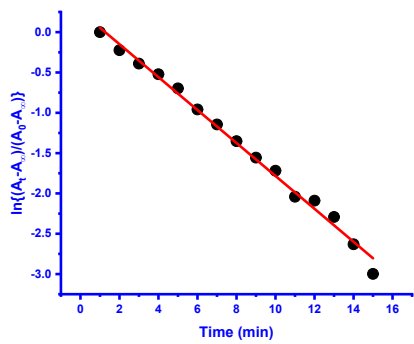

(c)

**Figure S10.** **a)** UV-Vis spectral changes observed in the presence of O<sub>2</sub> in DMF solution of [Ni(L1)(fla)]ClO<sub>4</sub> **1** ( $1 \times 10^{-4}$  M) at 70 °C; **b)** The time course of absorbance at 444 nm and **c)** Plot of  $\ln\{(A_t - A_\infty)/(A_0 - A_\infty)\}$  vs time vs time for the band observed at 444 nm.

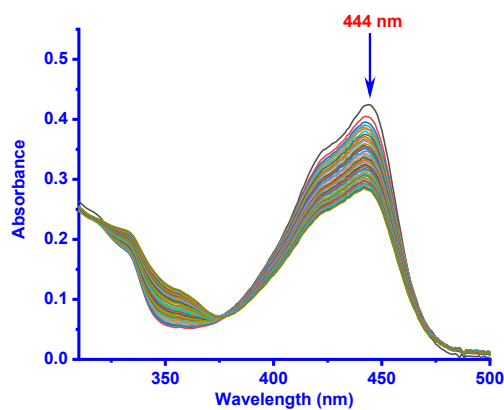

**(a)**

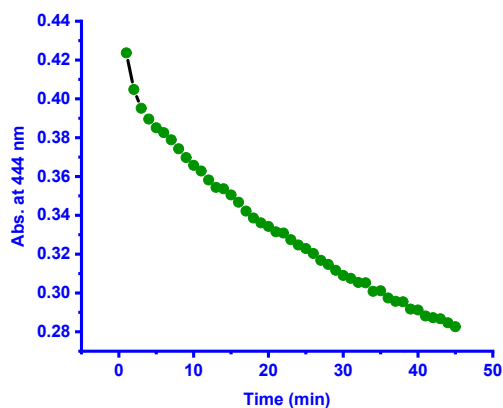

**(b)**

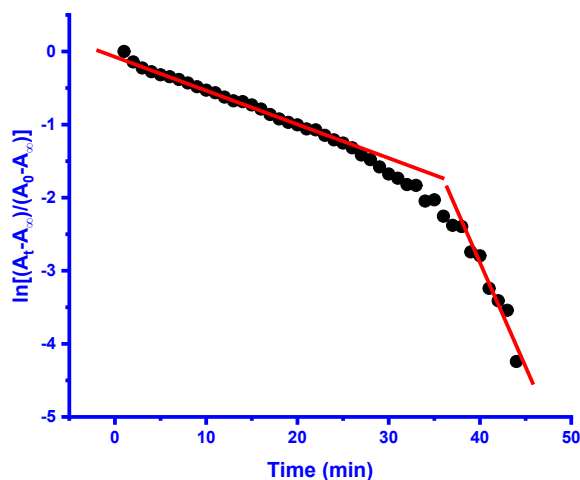

**(c)**

**Figure S11.** **a)** UV-Vis spectral changes observed in the presence of atmospheric O<sub>2</sub> in DMF solution of [Ni(L2)(fla)]ClO<sub>4</sub> **2** ( $1 \times 10^{-4}$  M) at 70 °C; **b)** The time course of absorbance at 444 nm and **c)** Plot of  $\ln\{(A_t - A_\infty)/(A_0 - A_\infty)\}$  vs time for the band observed at 444 nm.

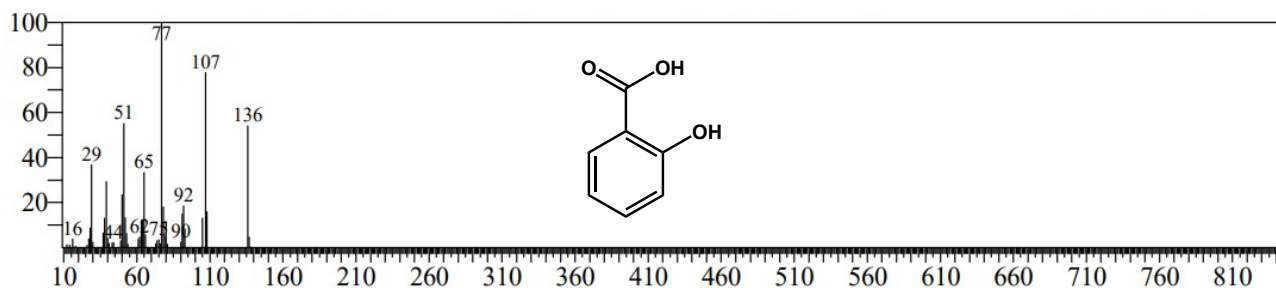

(a)

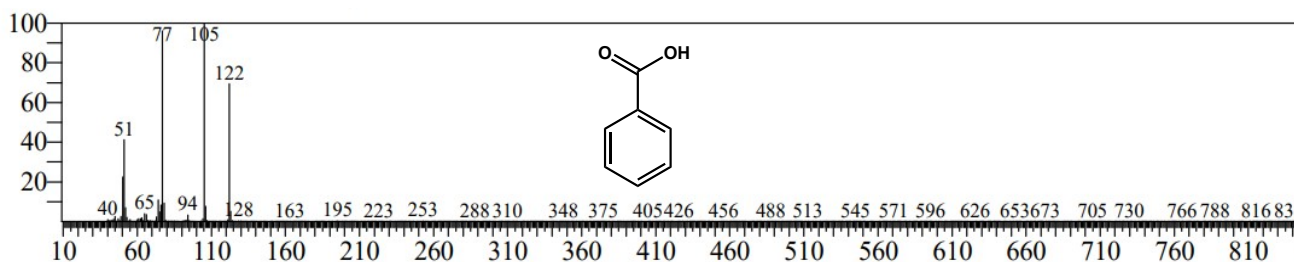

(b)

**Figure S12.** GC-MS product analysis of the products of reactions between dioxygen ES model complexes  $[\text{Ni}(\text{L})(\text{fla})]^+ \mathbf{1-3}$  in DMF at 70 °C to give rise to (a) salicylic acid [ $m/z$  (neg.): 136 ( $\text{M} - 2\text{H}^-$ )] (20–60%), (b) benzoic acid [ $m/z$  (neg.): 122 ( $\text{M}^+$ )] (21–43%), as ultimate products (Scheme 2).

**Table S12.** GC-MS analysis of the products of reaction between dioxygen and ES model complexes  $[\text{Ni}(\text{L})(\text{fla})]^+ \mathbf{1-3}$  ( $1.0 \times 10^{-3}$  M) in DMF solution at 70 °C.

| Complex | Yield (%) |
|---------|-----------|
|---------|-----------|

|                                           | Salicylic acid | Benzoic acid | 2-Hydroxy- <i>N,N</i> -dimethylbenzamide | <i>N,N</i> -Dimethylbenzamide |
|-------------------------------------------|----------------|--------------|------------------------------------------|-------------------------------|
| [Ni(L1)(fla)](ClO <sub>4</sub> ) <b>1</b> | 45             | 30           | 12                                       | -                             |
| [Ni(L2)(fla)](ClO <sub>4</sub> ) <b>2</b> | 20             | 43           | 4                                        | 8                             |
| [Ni(L3)(fla)](ClO <sub>4</sub> ) <b>3</b> | 60             | 21           | -                                        | 14                            |

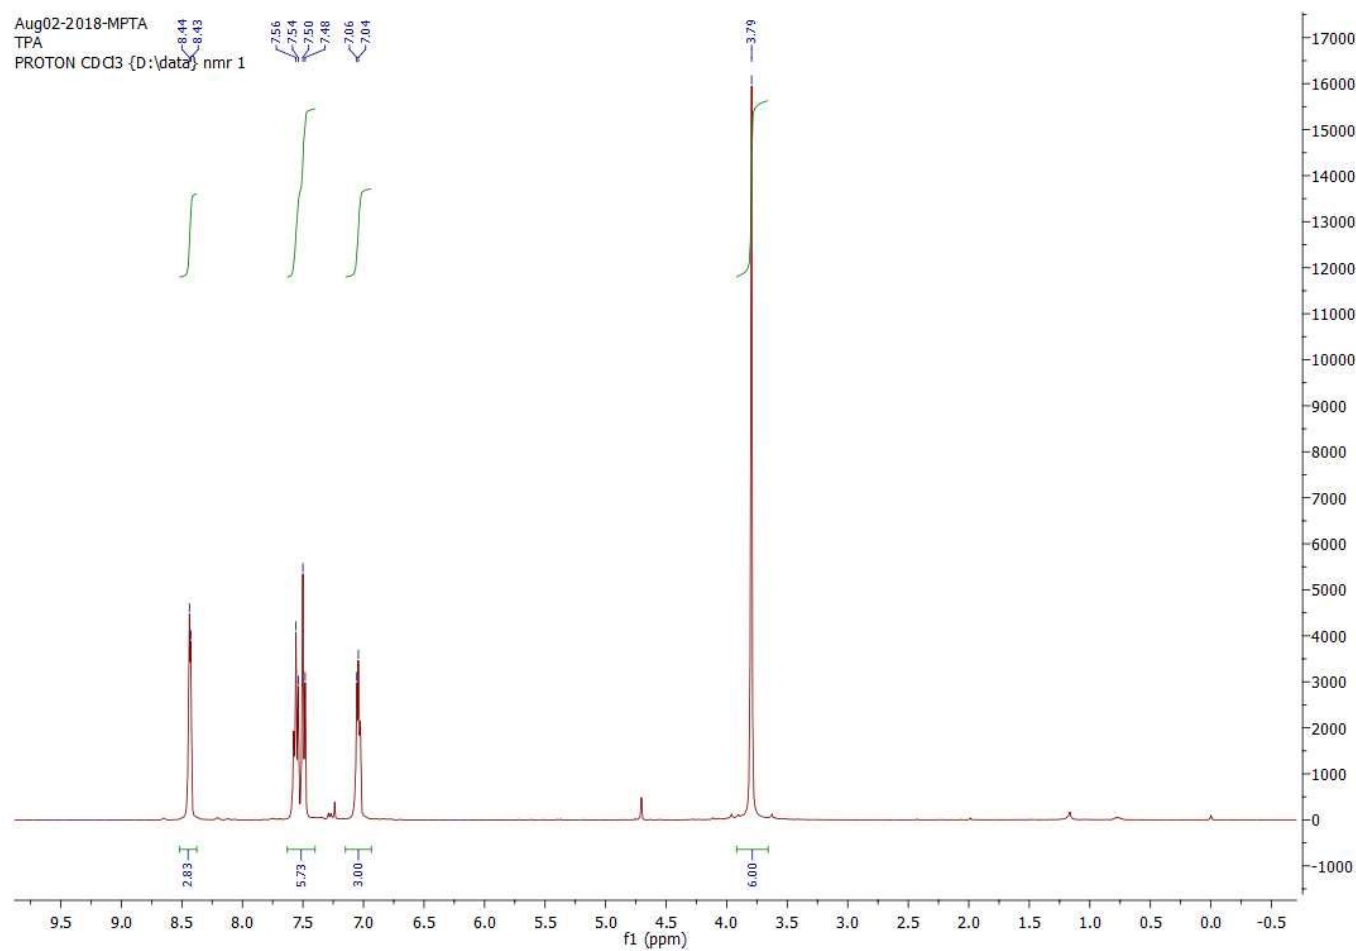

**Figure S13.** <sup>1</sup>H NMR spectra for the ligand L1.

Aug02-2018-MPTA  
TPA  
C13CPD CDCl3 {D:\data} nmr 1

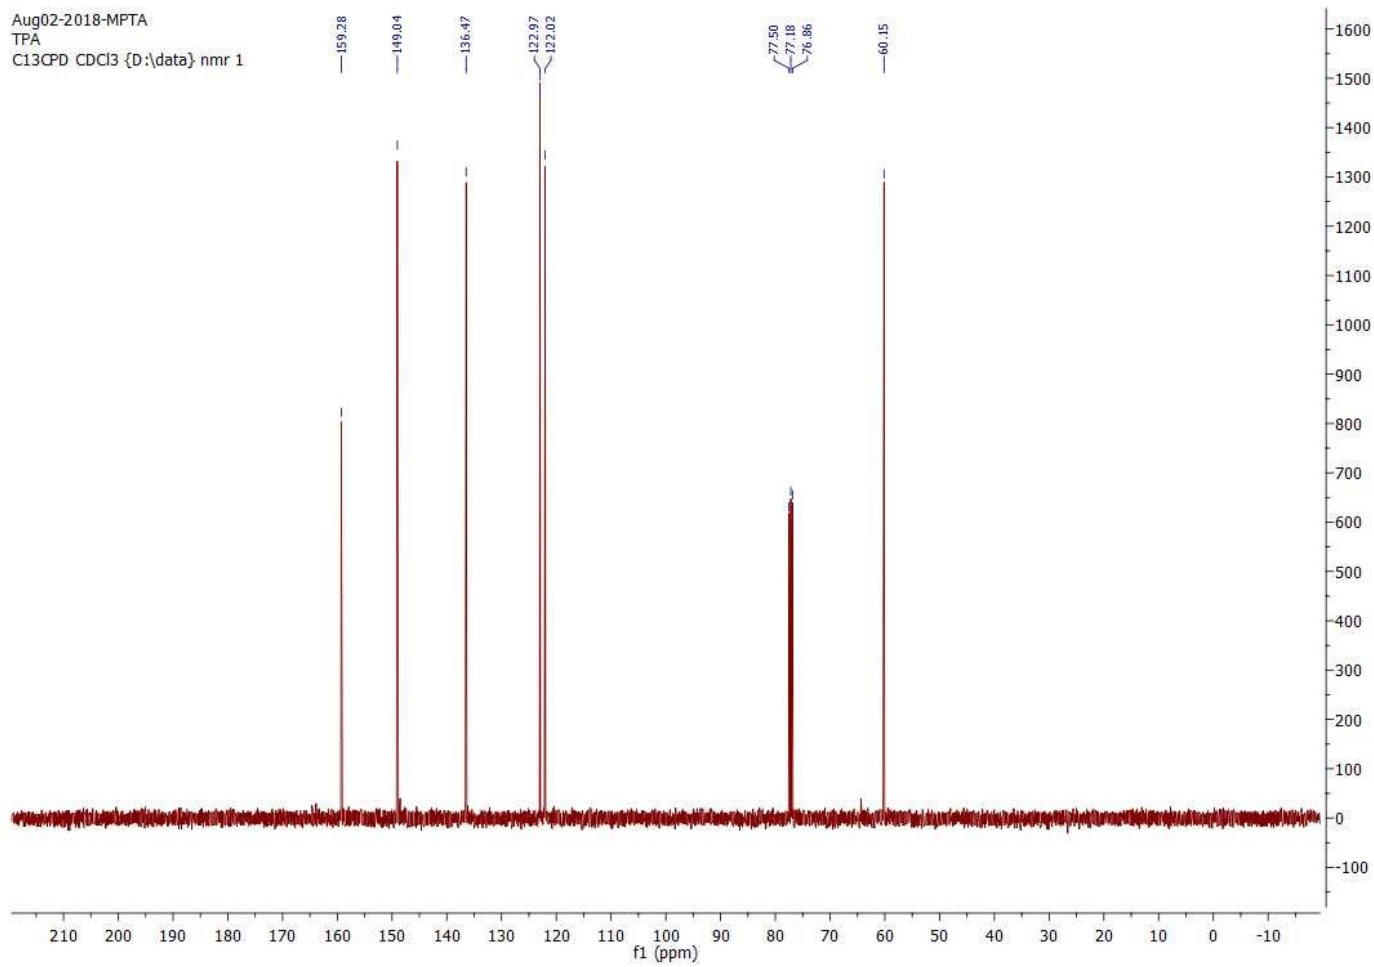

**Figure S14.**  $^{13}\text{C}$  NMR spectra for the ligand **L1**.

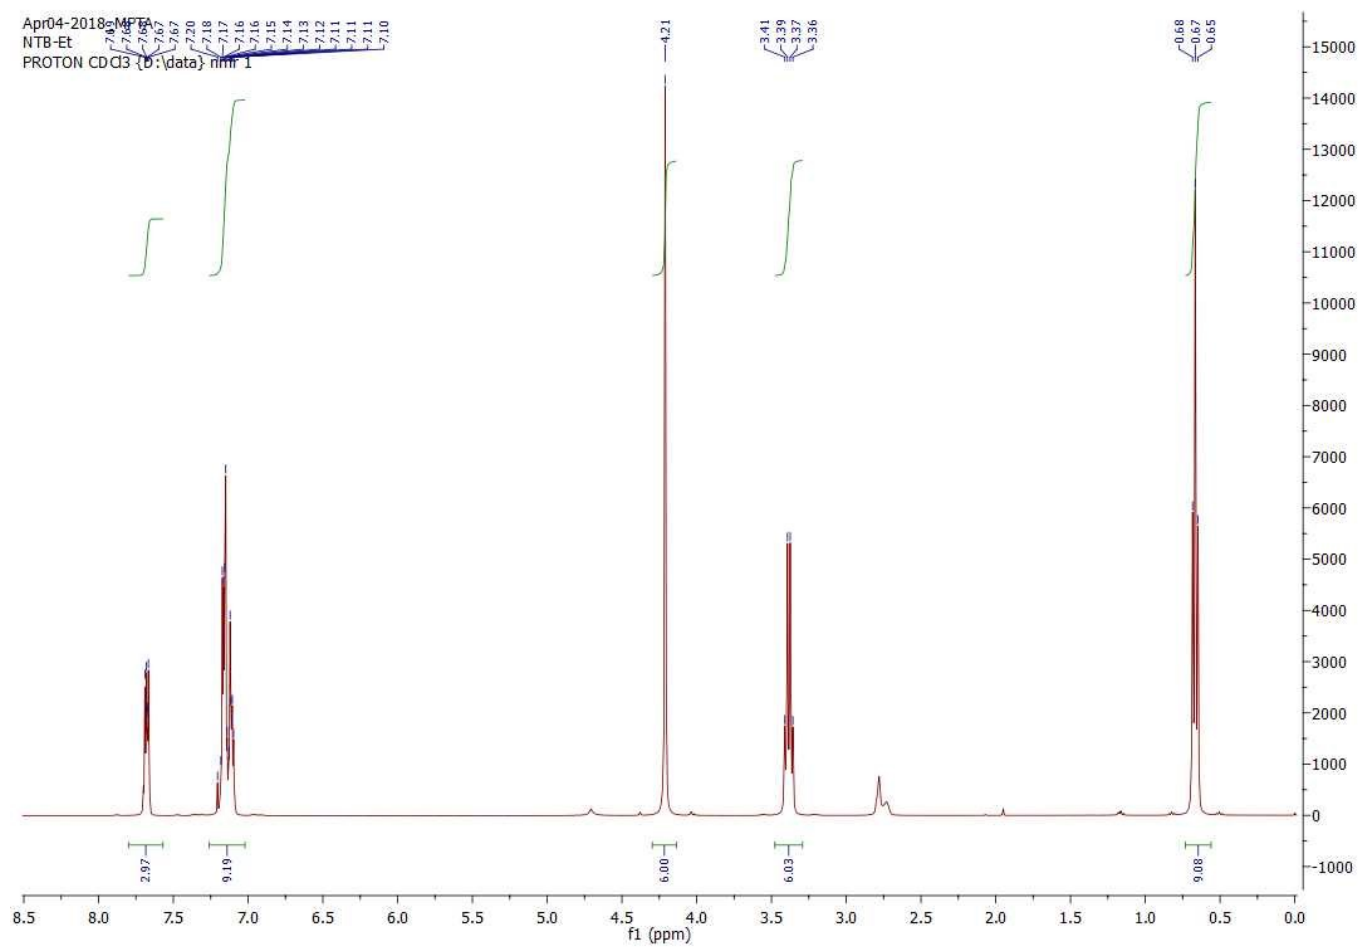

**Figure S15.**  $^1\text{H}$  NMR spectra for the ligand L3.

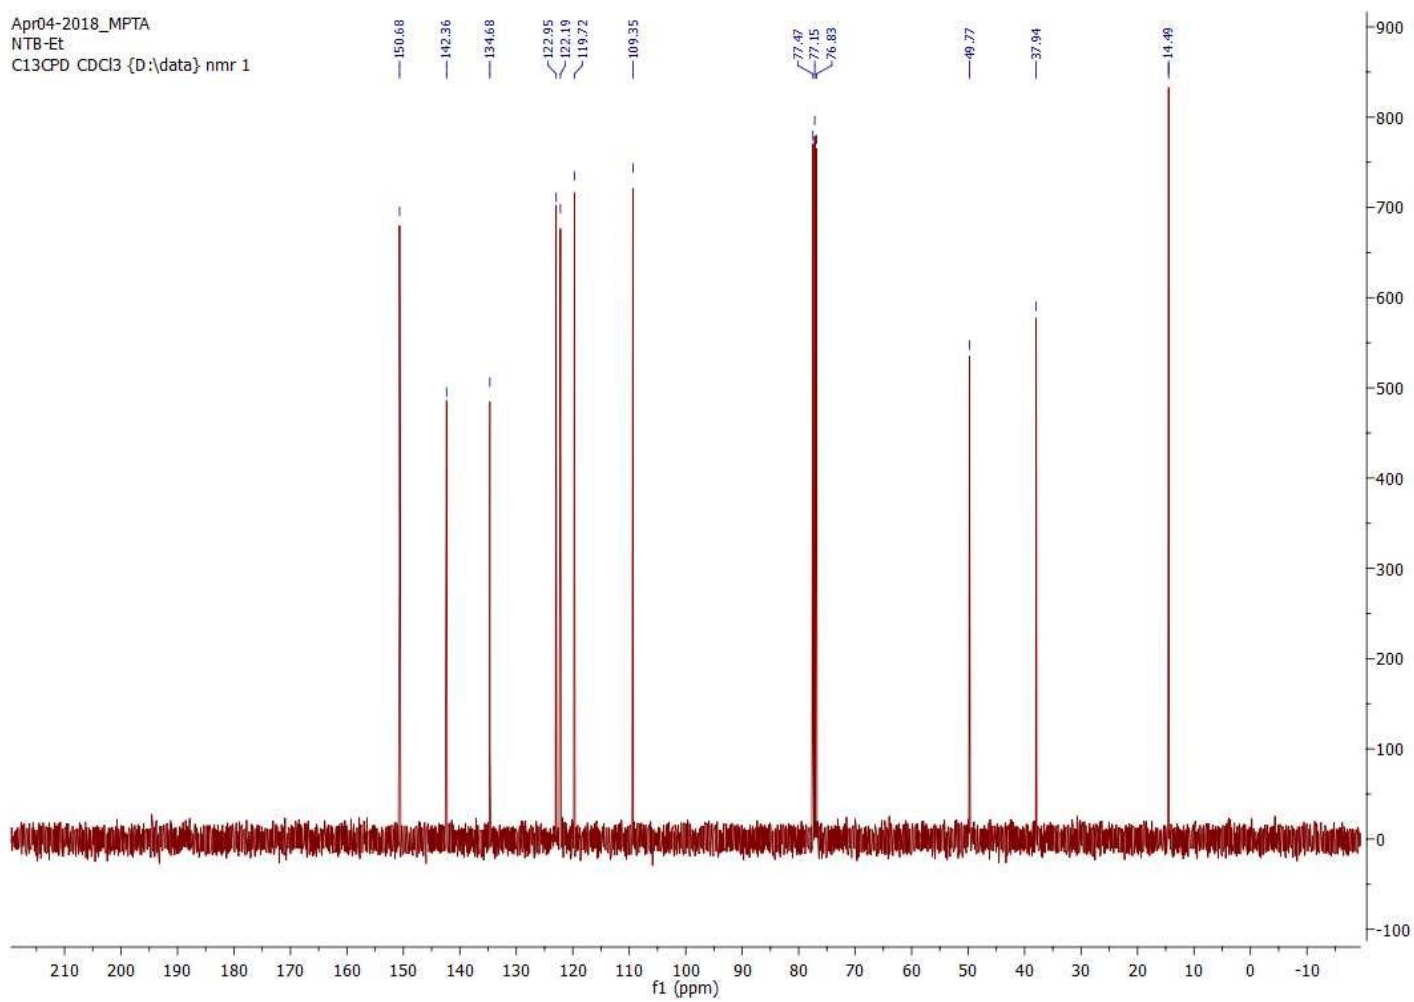

**Figure S16.**  $^{13}\text{C}$  NMR spectra for the ligand **L3**.





TPY #166 RT: 1.13 AV: 1 NL: 1.93E6  
F: ITMS + p ESI Full ms [100.00-1000.00]

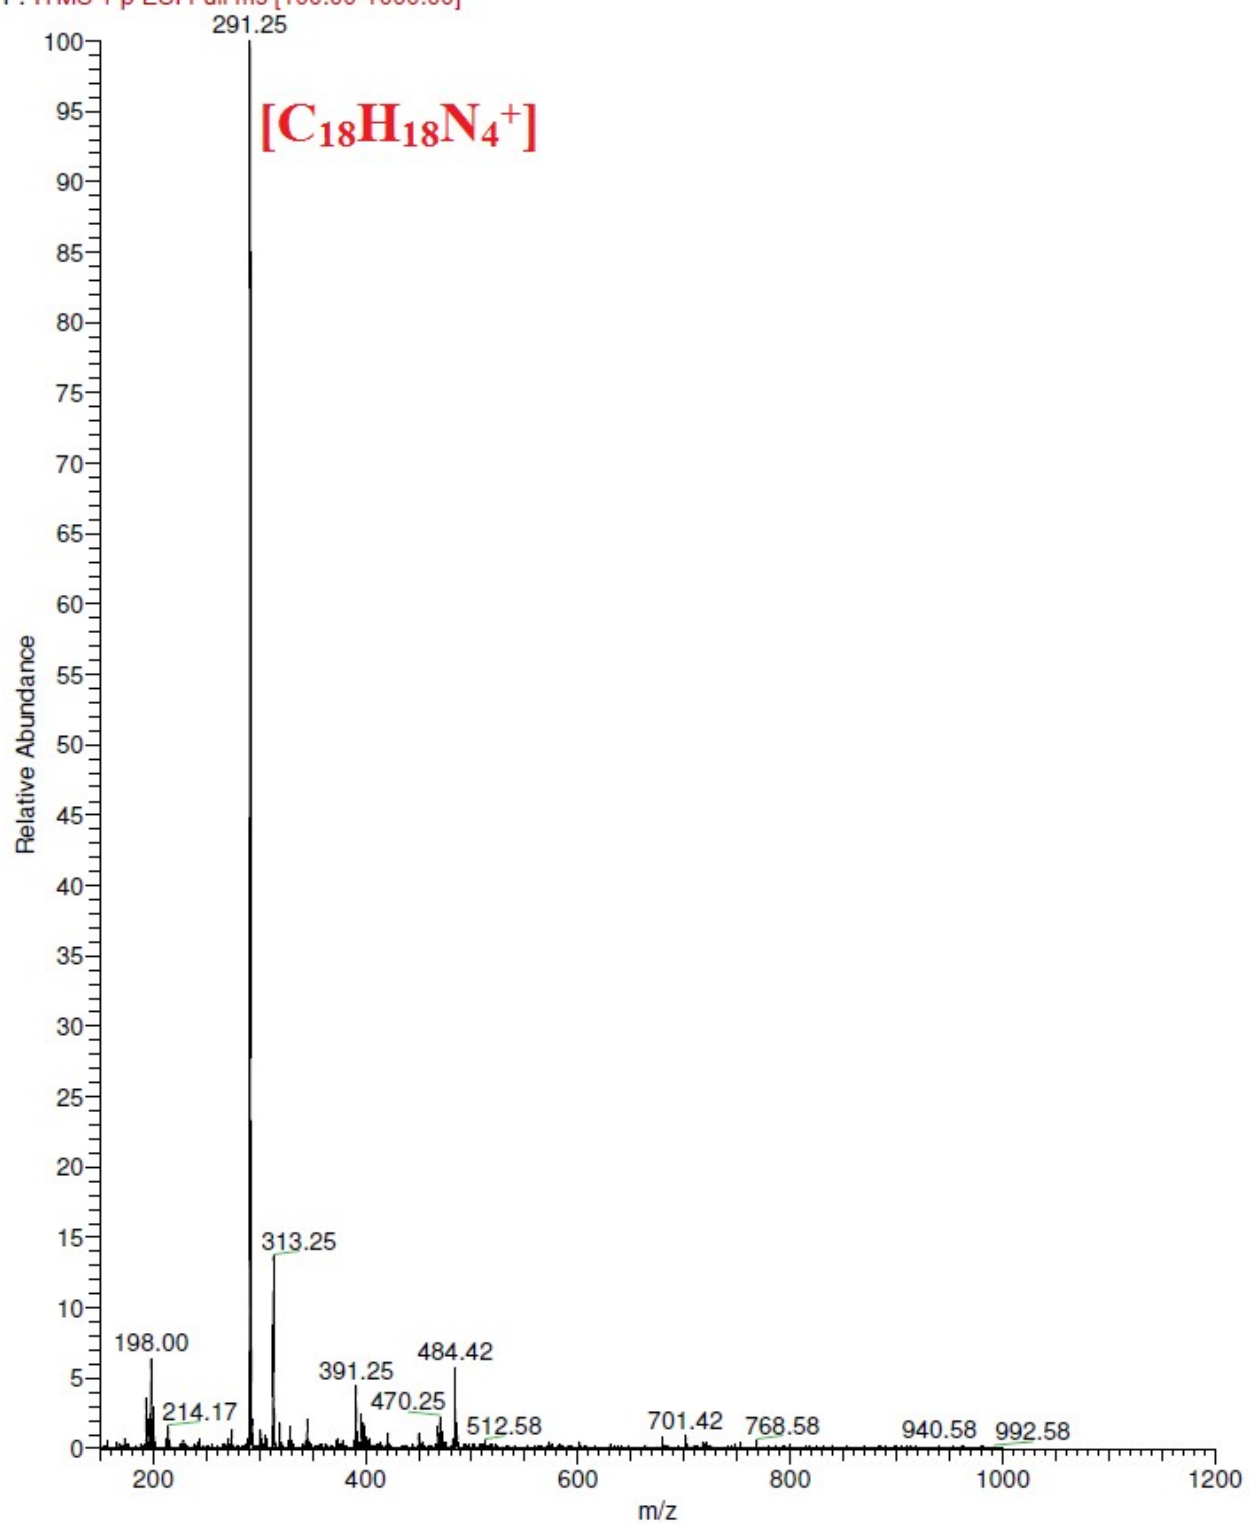

**Figure S17.** LC-MS of tris(2-pyridylmethyl)amine(tpa) **L1** in methanol solution ( $1 \times 10^{-3}$  M) at 25 °C.

NTB-Et #56 RT: 0.55 AV: 1 NL: 4.63E9

T: FTMS + p ESI Full ms [200.0000-1000.0000]

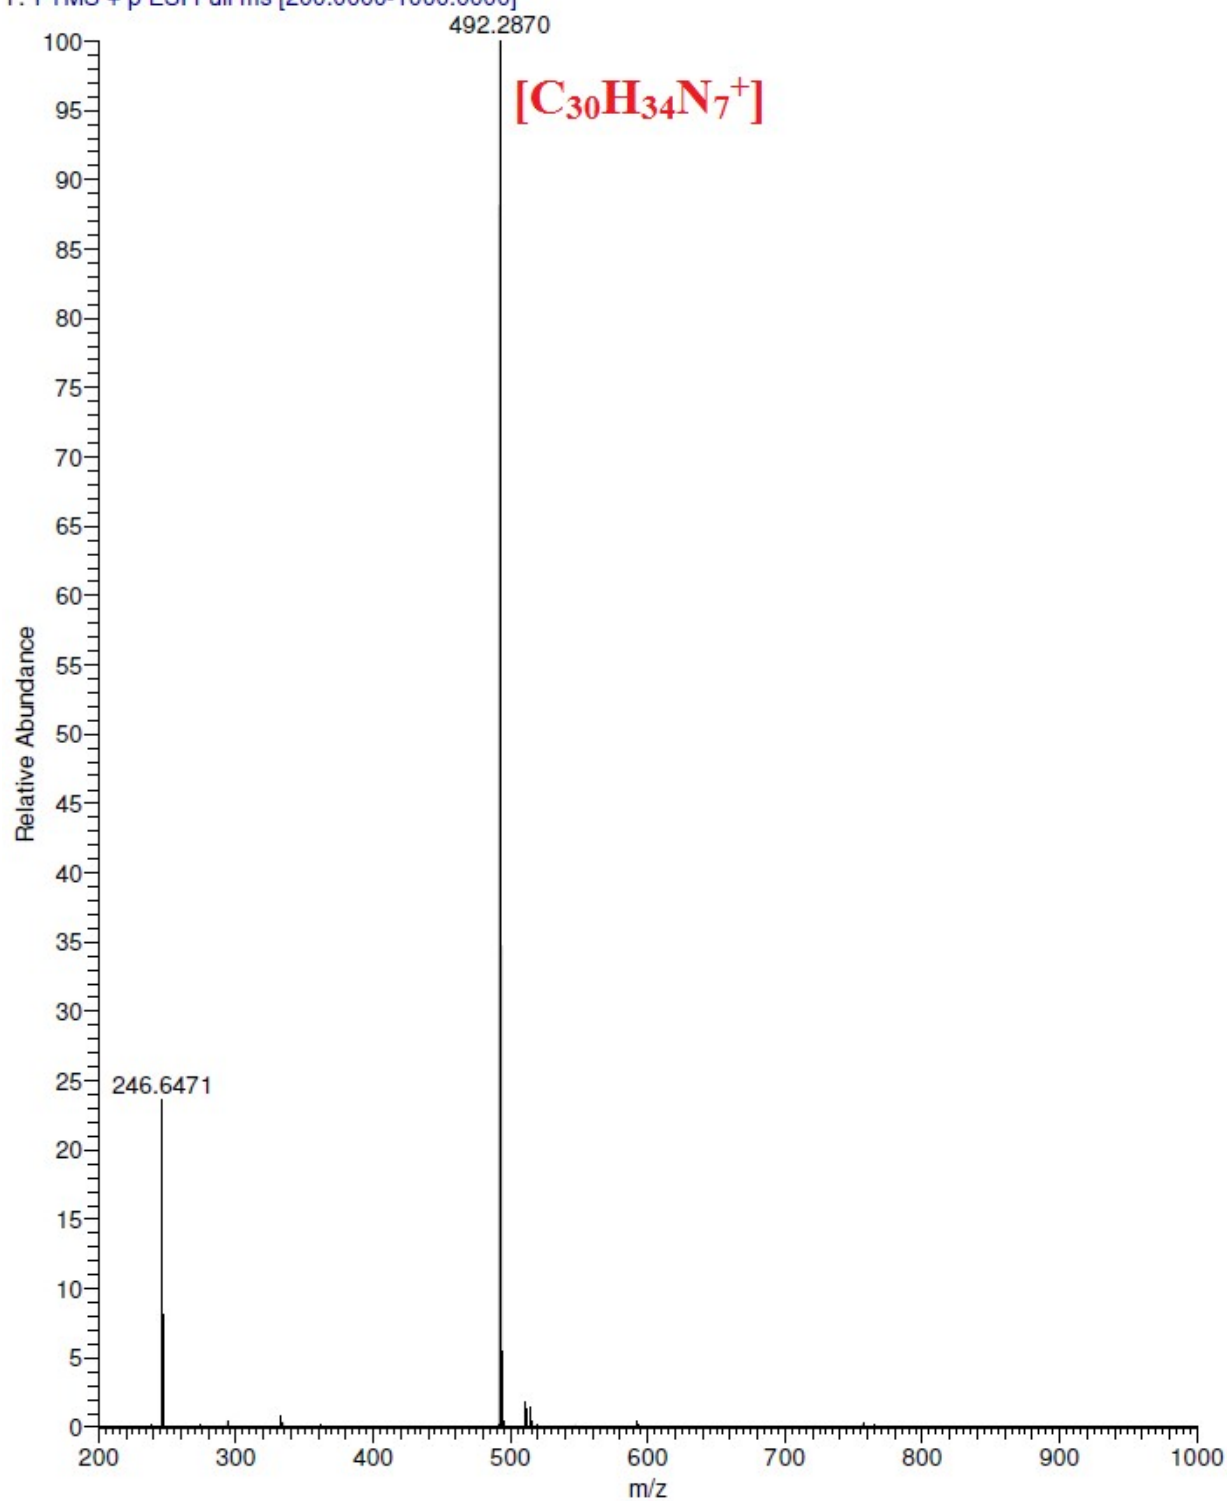

**Figure S18.** High Resolution Mass Spectra of tris(*N*-Et-benzimidazol-2-ylmethyl)amine (Et-ntb) **L3** in methanol solution ( $1 \times 10^{-3}$  M) at 25 °C.

Ni-TPA #104 RT: 1.02 AV: 1 NL: 2.86E8

T: FTMS + p ESI Full ms [150.0000-2000.0000]

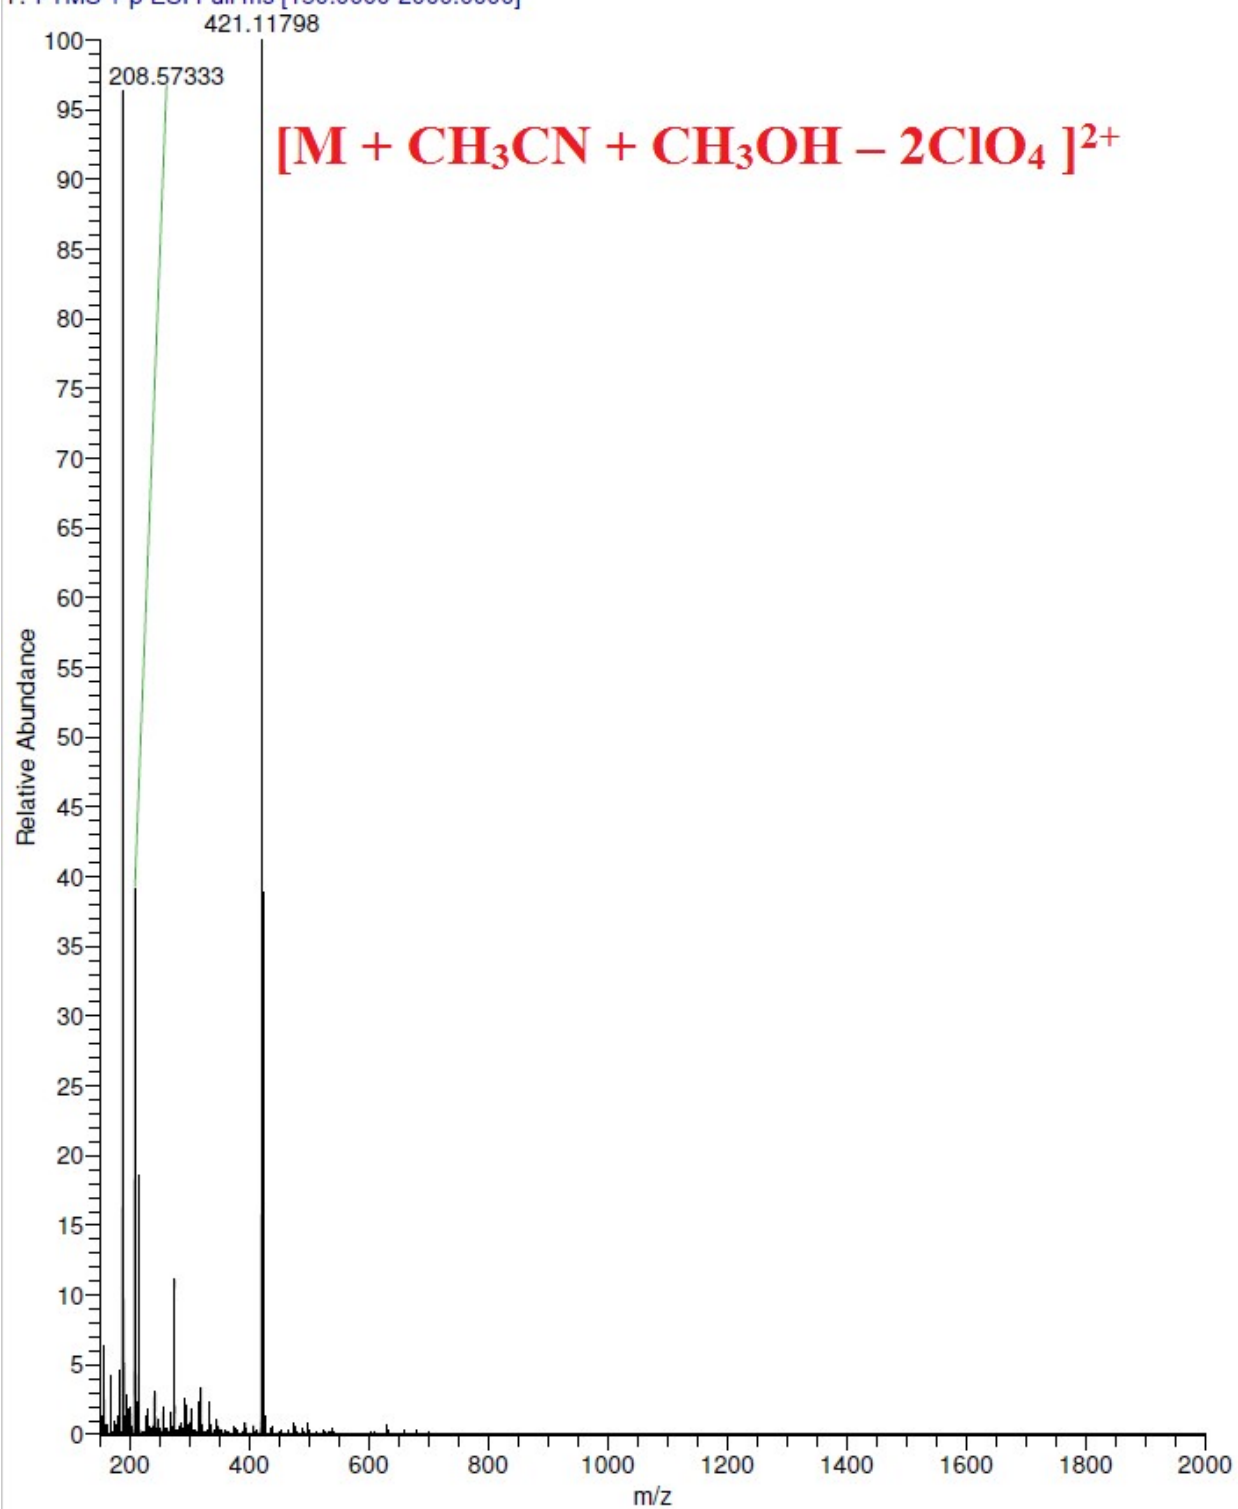

**Figure S19.** High Resolution Mass Spectra of  $[\text{Ni}(\text{L}1)](\text{ClO}_4)_2$  **1a** in acetonitrile solution ( $1 \times 10^{-3}$  M) at 25 °C.

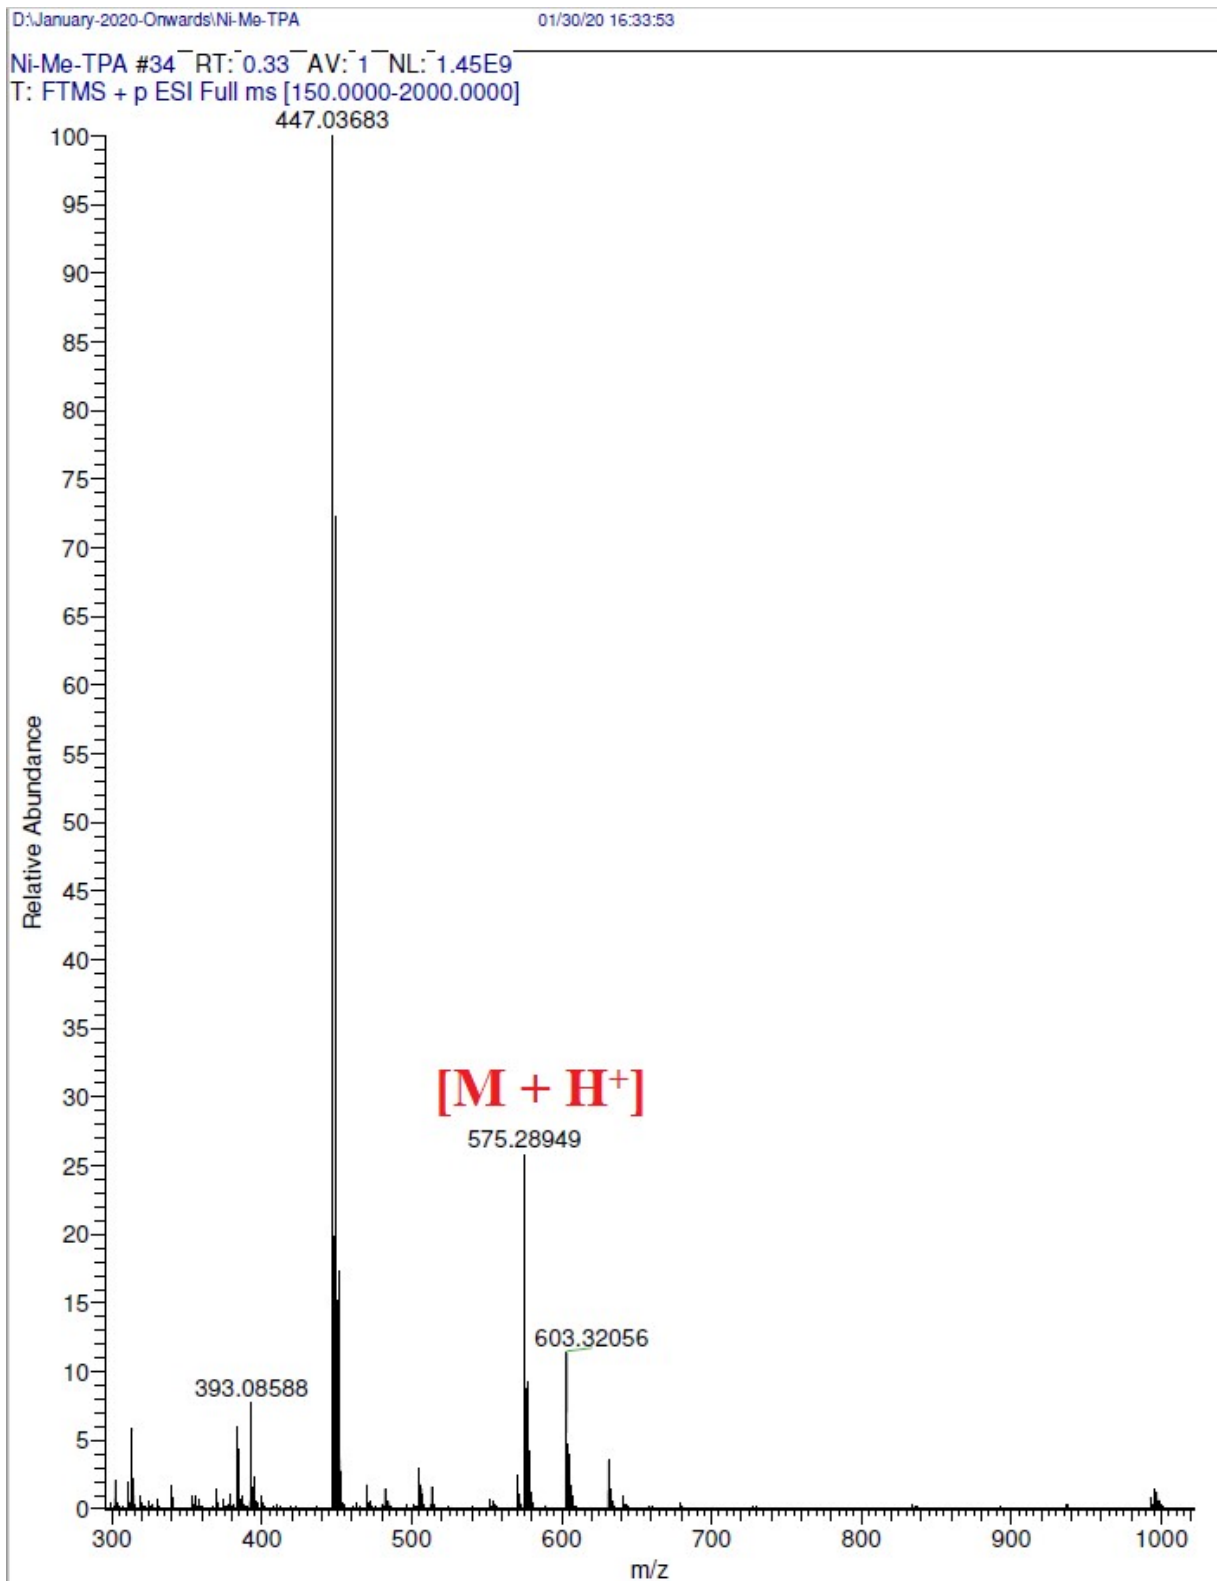

**Figure S20.** High Resolution Mass Spectra of  $[\text{Ni}(\text{L}2)](\text{ClO}_4)_2 \mathbf{2a}$  in acetonitrile solution ( $1 \times 10^{-3}$  M) at 25 °C.

Ni-Et-NTB #42 RT: 0.41 AV: 1 NL: 4.68E9  
T: FTMS + p ESI Full ms [100.0000-1500.0000]

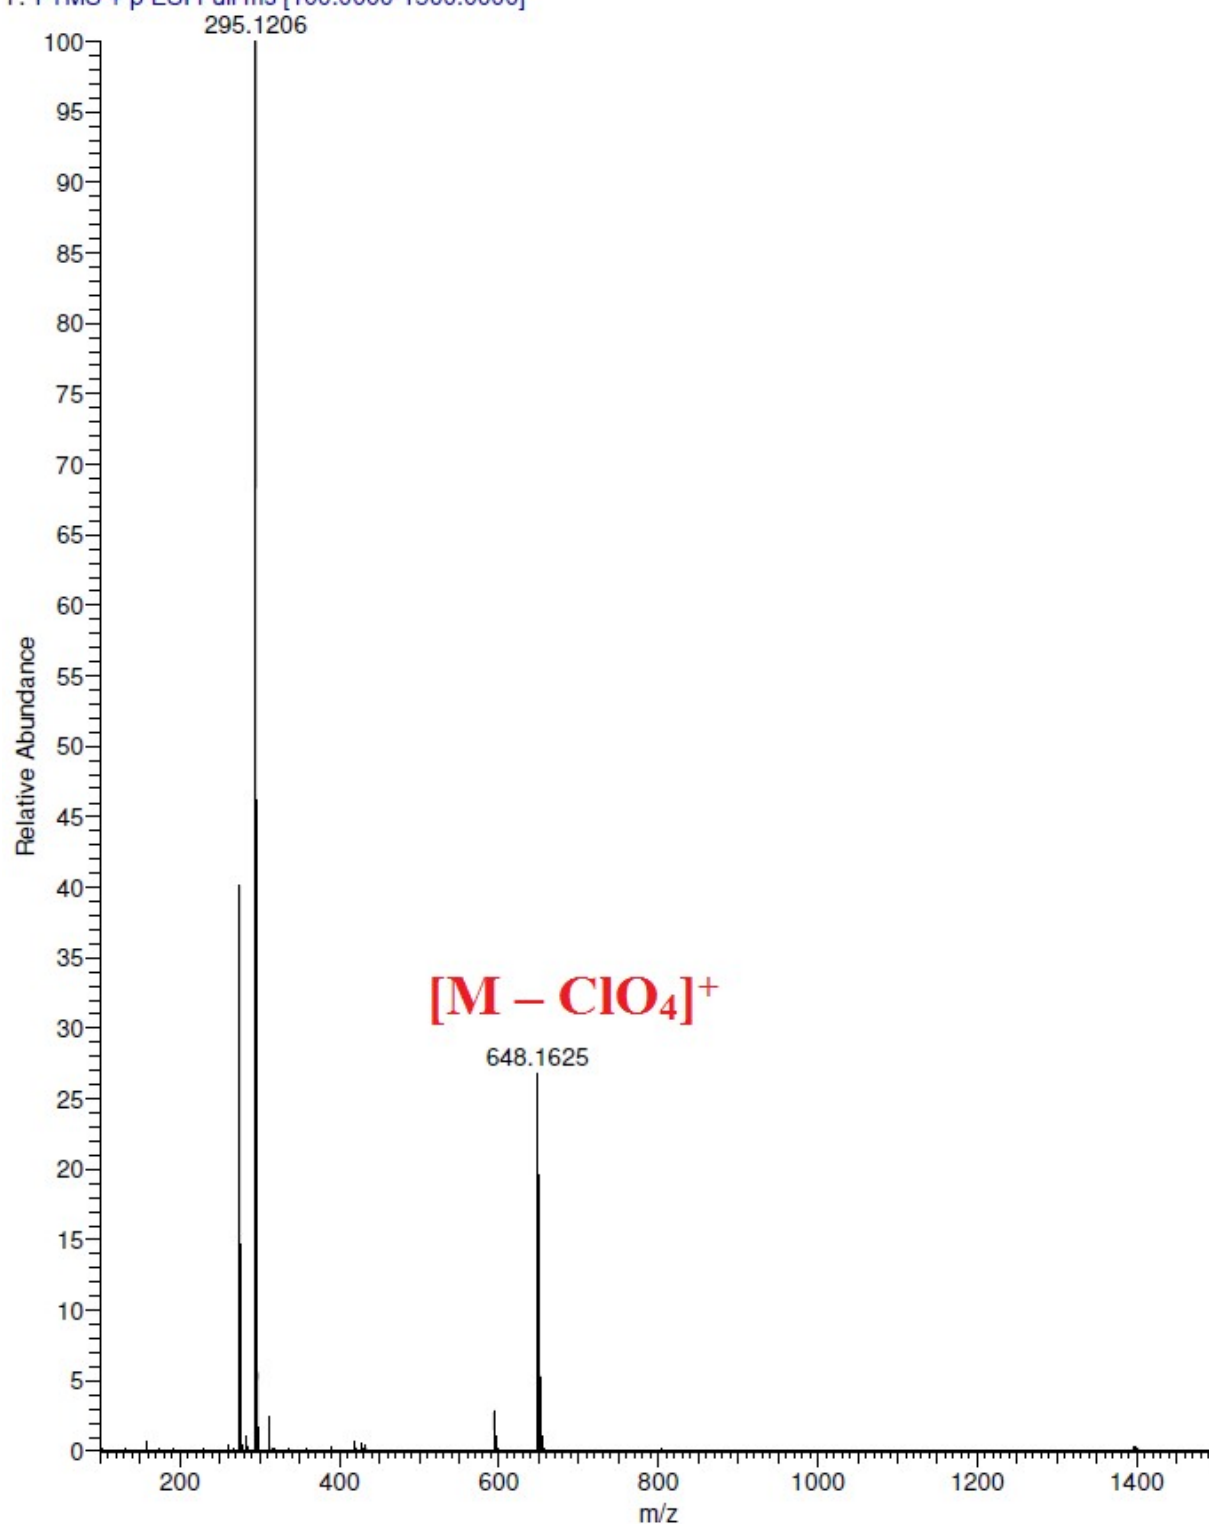

**Figure S21.** High Resolution Mass Spectra of  $[\text{Ni}(\text{L}3)](\text{ClO}_4)_2 \mathbf{3a}$  in acetonitrile solution ( $1 \times 10^{-3}$  M) at 25 °C.

Ni-TPA-Fla #29 RT: 0.32 AV: 1 NL: 2.62E9  
T: FTMS + p ESI Full ms [150.0000-1000.0000]

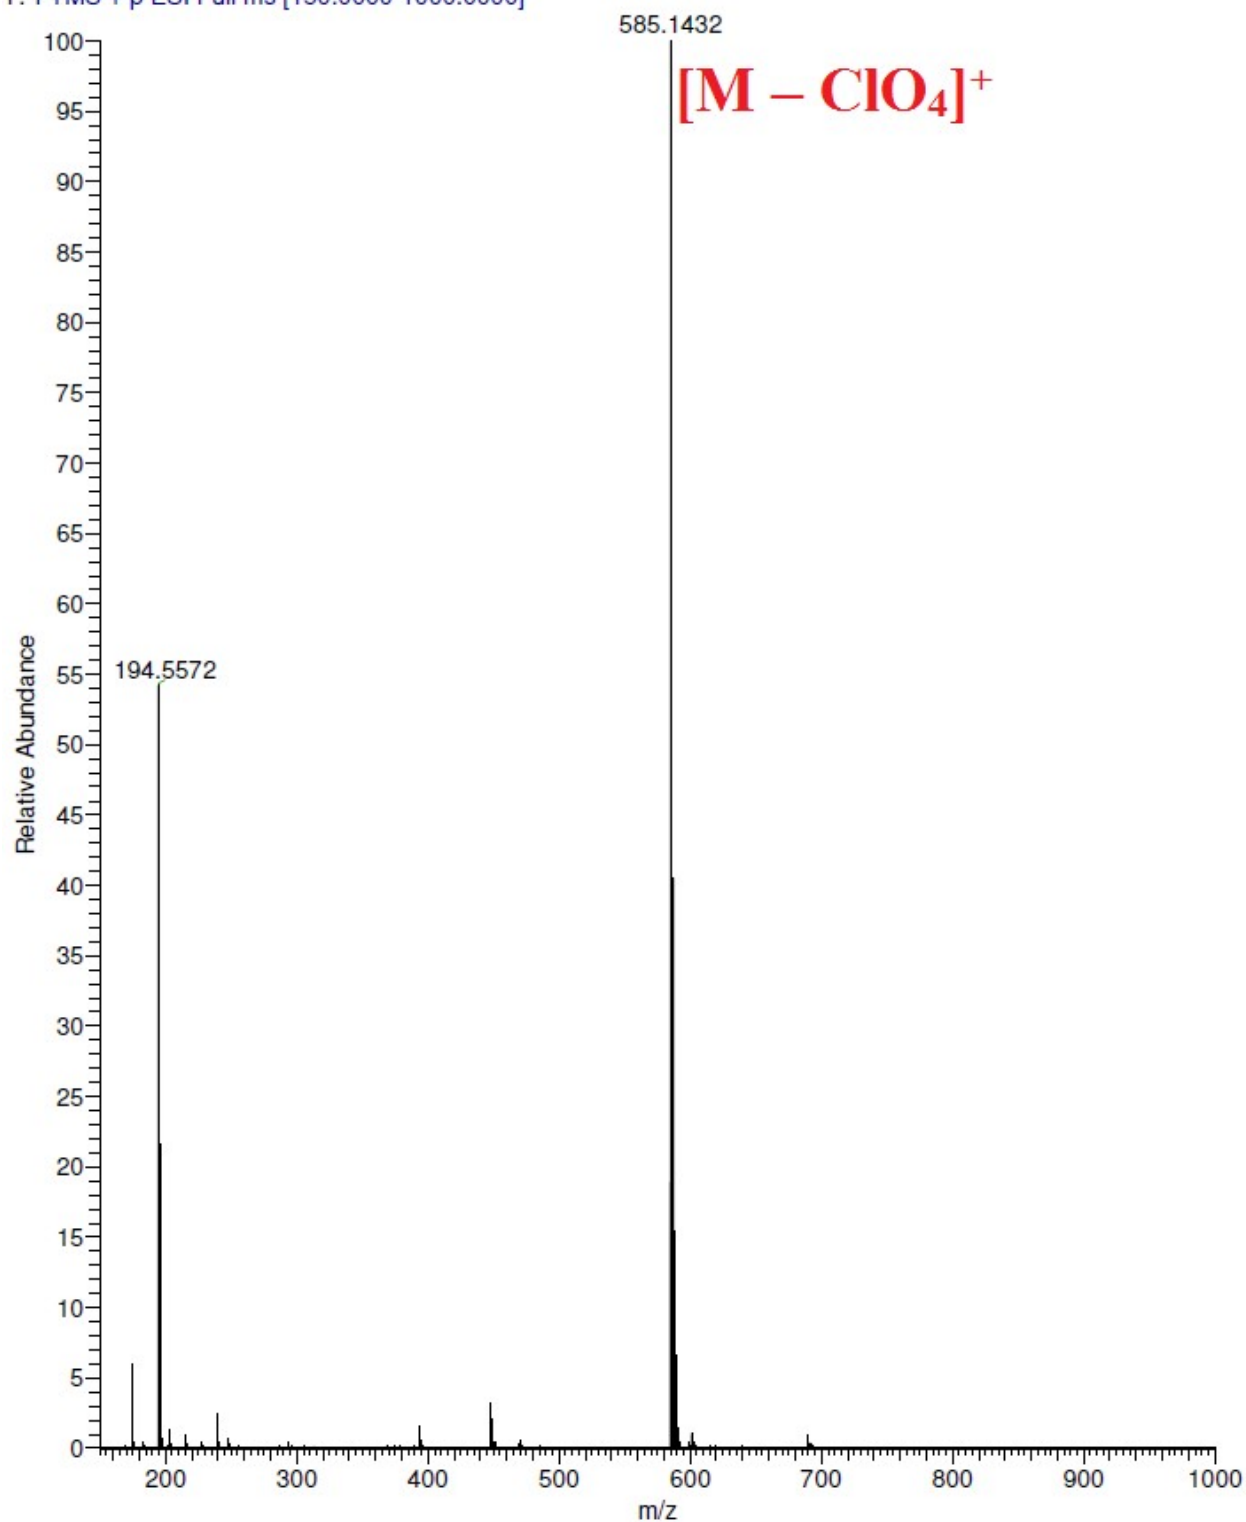

**Figure S22.** High Resolution Mass Spectra of  $[Ni(L1)(fla)]ClO_4$  **1** in acetonitrile solution ( $1 \times 10^{-3}$  M) at 25 °C.

Ni-Me-Fla #38 RT: 0.38 AV: 1 NL: 1.43E9  
T: FTMS + p ESI Full ms [150.0000-2000.0000]

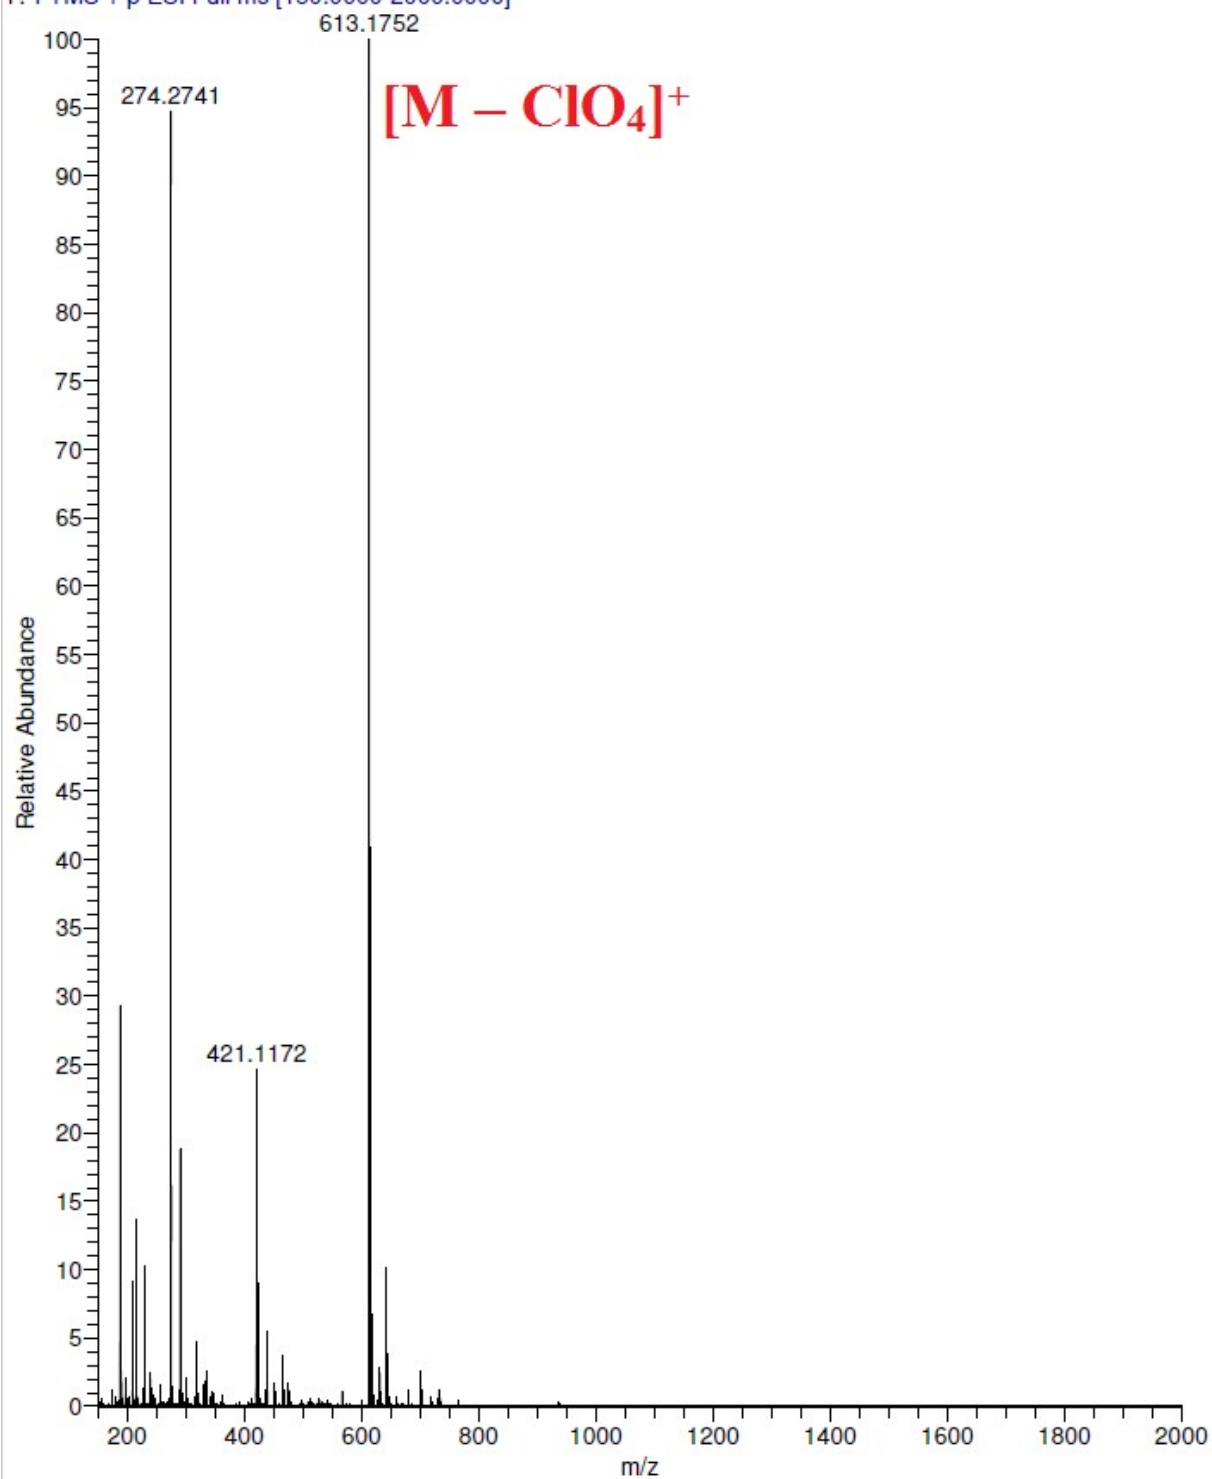

**Figure S23.** High Resolution Mass Spectra of  $[\text{Ni}(\text{L}2)(\text{fla})]\text{ClO}_4 \cdot 2$  in acetonitrile solution ( $1 \times 10^{-3}$  M) at 25 °C.



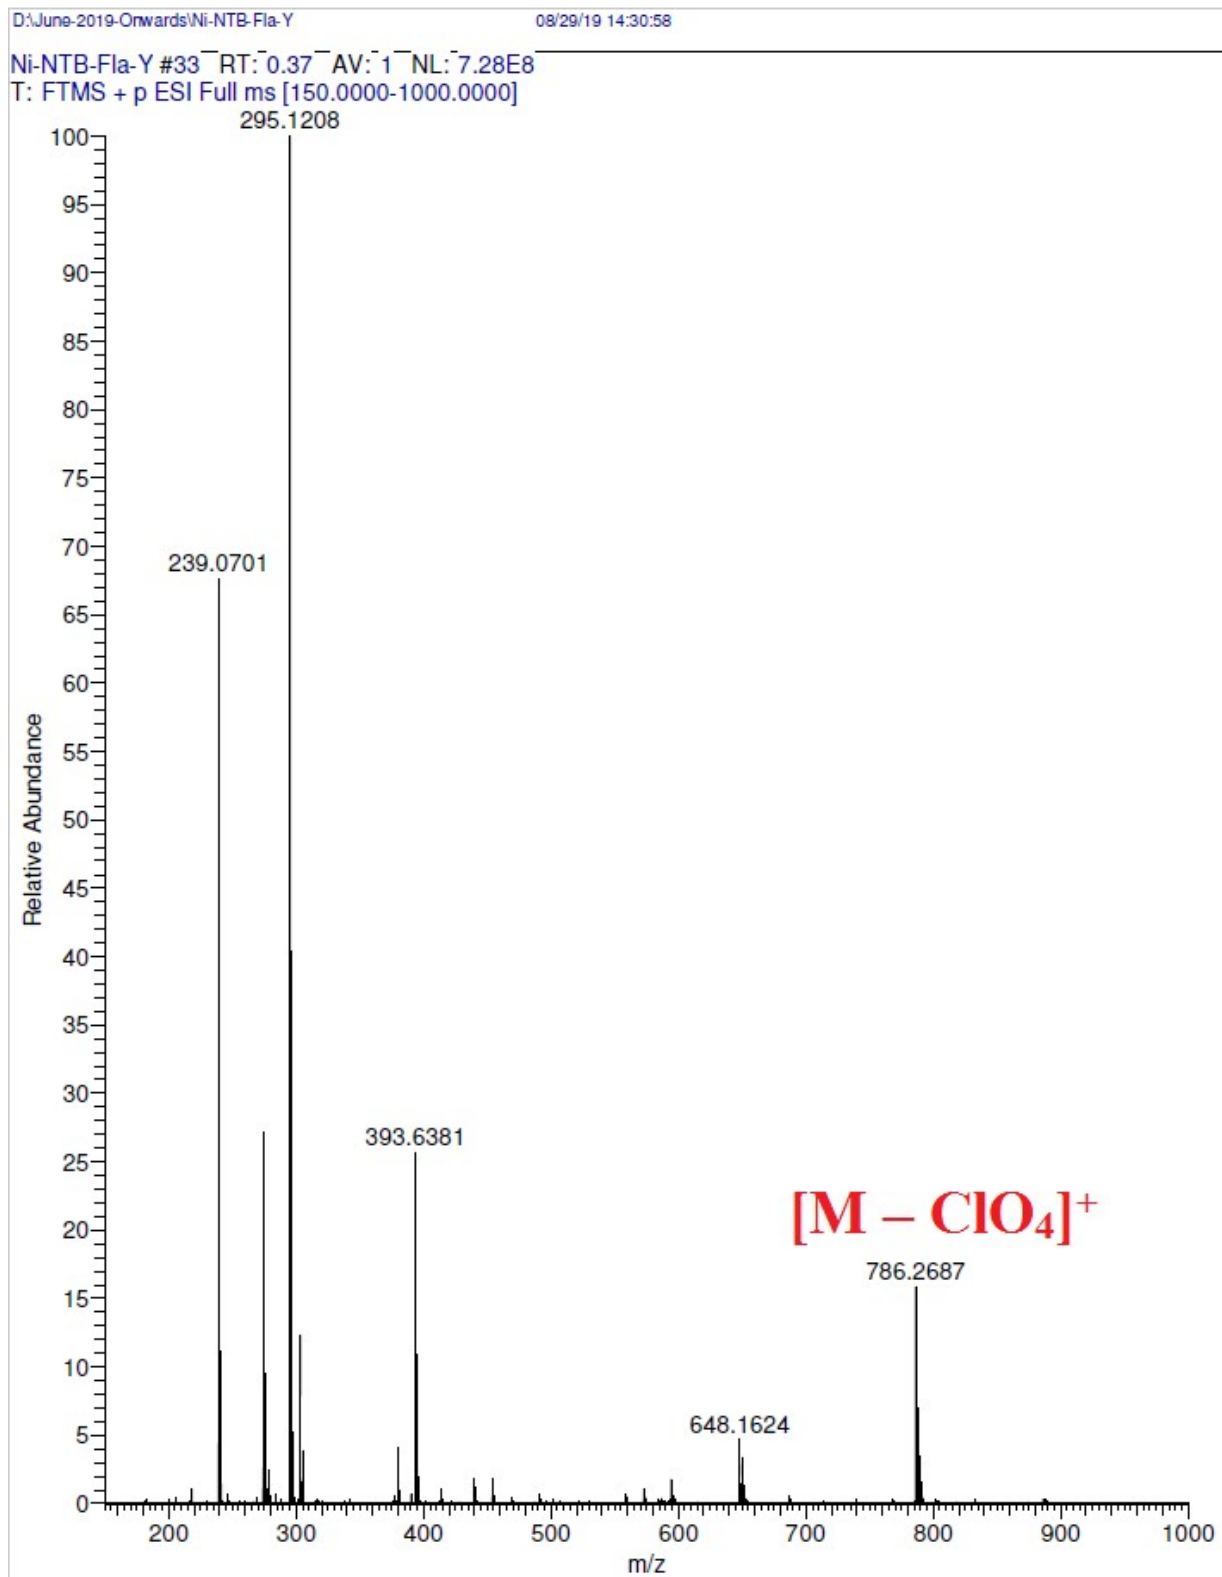

**Figure S24.** High Resolution Mass Spectra of  $[Ni(L3)(fla)]ClO_4 \mathbf{3}$  in acetonitrile solution ( $1 \times 10^{-3}$  M) at 25 °C.

## References

1. D. Jeong, S. Sun, D. Moon and J. Cho, *J. Inorg. Biochem.*, 2022, **226**, 111632.
2. T. Ajaykamal, M. Sharma, N. S. Islam and M. Palaniandavar, *Dalton Trans.*, 2021, **50**, 8045-8056.
